1 **Integrated pathogen load and dual transcriptome analysis of systemic host-pathogen interactions**  
2 **in severe malaria**

3

4 Hyun Jae Lee<sup>1</sup>, Michael Walther<sup>2</sup>, Athina Georgiadou<sup>3</sup>, Davis Nwakanma<sup>2</sup>, Lindsay B. Stewart<sup>4</sup>,  
5 Michael Levin<sup>3</sup>, Thomas D. Otto<sup>5#</sup>, David J. Conway<sup>4#</sup>, Lachlan J. Coin<sup>1#</sup>, Aubrey J. Cunnington<sup>3\*</sup>

6

7 <sup>1</sup>Institute for Molecular Bioscience, University of Queensland, Brisbane, Australia

8 <sup>2</sup>Medical Research Council Gambia Unit, Fajara, The Gambia

9 <sup>3</sup>Section of Paediatrics, Imperial College, London, UK

10 <sup>4</sup>Department of Pathogen Molecular Biology, London School of Hygiene and Tropical Medicine, UK

11 <sup>5</sup> Wellcome Trust Sanger Centre, Hinxton, United Kingdom

12 \*Corresponding author: [a.cunnington@imperial.ac.uk](mailto:a.cunnington@imperial.ac.uk) (AJC), #Denotes equal contribution

13

14 **Abstract**

15 The pathogenesis of severe *Plasmodium falciparum* malaria is incompletely understood. Since the  
16 pathogenic stage of the parasite is restricted to blood, dual RNA-sequencing of host and parasite  
17 transcripts in blood can reveal their interactions at a systemic scale. Here we identify human and  
18 parasite gene expression associated with severe disease features in Gambian children. Differences in  
19 parasite load explained up to 99% of differential expression of human genes but only a third of the  
20 differential expression of parasite genes. Co-expression analyses showed a remarkable co-regulation  
21 of host and parasite genes controlling translation, and host granulopoiesis genes uniquely co-  
22 regulated and differentially expressed in severe malaria. Our results indicate that high parasite load  
23 is the proximal stimulus for severe *P. falciparum* malaria, that there is an unappreciated role for  
24 many parasite genes in determining virulence, and hint at a molecular arms-race between host and  
25 parasite to synthesise protein products.

26

## 27 **Introduction**

28 *Plasmodium falciparum* malaria is one of the most important infectious diseases affecting  
29 humankind[1]. Progress has been made in malaria treatment and control in the last decade but this  
30 is threatened by the spread of antimalarial and insecticide resistance[2-4]. Understanding of  
31 pathogenic mechanisms associated with severe malaria (SM), which puts individuals at risk of death,  
32 has also progressed[1, 5, 6]. Immunopathology, vascular endothelial dysfunction and parasite  
33 sequestration (obstruction of the microvasculature by cytoadherent parasites) all have putative roles  
34 in SM[5], and high parasite load is also strongly associated with greater risk of severe disease[5, 7-  
35 10]. Rodent models have contributed to mechanistic dissection of the pathogenic processes, but  
36 these cannot yet reproduce all of the features of naturally-occurring *P. falciparum* malaria[6, 11]. An  
37 integrated understanding of the respective roles and interactions of host and parasite in human SM  
38 is notably lacking, and whether SM involves excessive, proportionate or insufficient host responses  
39 to the parasite is largely unknown. Here we combine estimates of parasite load with host and  
40 parasite whole blood gene expression to investigate their associations with severity and different  
41 pathological features of SM, aiming to provide a global view of systemic host-parasite interaction.  
42 This approach allows us to harness the natural variation which occurs between humans infected  
43 with *P. falciparum* to better understand the different pathogenic processes which underlie SM.

44

## 45 **Results**

46 We performed dual-RNA sequencing on whole blood of 46 Gambian children with uncomplicated  
47 (UM, n=21) and severe (SM, n=25) *P. falciparum* malaria (Supplementary Table 1). After exclusion of  
48 *var*, *rifin*, *stevor*[12] and highly polymorphic regions in the parasite genome (see Methods), we  
49 obtained median 26.6 million (26.6 million SM, 26.7 million UM, P=0.913) human and 9.61 million  
50 (10.3 million SM, 5.03 million UM, P=0.346) parasite uniquely mapped reads from each subject (Fig  
51 1a), with considerably greater parasite read depth than a previous study conducted in adults with  
52 UM[13]. Systemic infection provokes changes in blood leukocyte subpopulations which could

53 dominate changes in gene expression[14] so we performed “gene signature” based  
54 deconvolution[15] to identify and adjust for heterogeneity in the major leukocyte subpopulations in  
55 each sample (Fig 1b, Supplementary Fig 1). Parasite gene expression *in vivo* is also influenced by the  
56 mixture of parasite developmental stages at the time of sampling because there is phasic variation in  
57 gene expression[16] and increasing RNA content during the intraerythrocytic developmental  
58 cycle[17]. Therefore we used the same deconvolution approach with “gene signatures” derived from  
59 highly synchronous parasite cultures[16, 18] to identify the contribution of parasites at different  
60 developmental stages (Supplementary Fig 2 and Fig 1c). There was a trend towards greater  
61 proportions of late stage asexual parasites and gametocytes in children with SM (Fig 1d).

62

63 Examination of principal component plots before and after adjustment for heterogeneity in the  
64 mixture of leukocytes and parasite developmental stages revealed that segregation of SM and UM  
65 cases was improved after adjustment (Fig 1e,f). Therefore we used these adjusted gene expression  
66 values for all subsequent analyses, essentially allowing us to compare gene expression as if all  
67 subjects had the same leukocyte and parasite population compositions.

68

69 Whole blood genome-wide gene expression can be used to characterise host cellular responses and  
70 infer upstream regulators[19], whilst variations in *P. falciparum* gene expression are believed to  
71 reflect adaptation to the host environment and contribute to virulence[20, 21]. We identified  
72 significantly differentially expressed genes from human and parasite in SM vs UM (Fig 2a,b) and also  
73 for different subtypes of SM (hyperlactatemia (HL) and cerebral malaria (CM), alone or in  
74 combination) vs UM (Supplementary Figure 3). There were 770 human and 236 parasite significantly  
75 differentially expressed genes (DEGs, with false discovery rate (FDR)-adjusted  $P < 0.05$ ) between SM  
76 and UM (Supplementary Table 2 and 3). Some human genes had both conspicuously high expression  
77 in SM relative to UM (high log-fold change) and were also highly significant (Fig 2a): the four most  
78 upregulated (*MMP8*, matrix metalloproteinase 8; *OLFM4*, olfactomedin 4; *DEFA3*, defensin A3;

79 *ELANE*, neutrophil elastase) notably all encode neutrophil granule proteins[22]. Interestingly the  
80 number of human and parasite DEGs was substantially higher when comparing the subgroup of  
81 subjects with cerebral malaria plus hyperlactatemia (CH, the most severe phenotype, n=12) vs UM,  
82 despite the smaller number of subjects (Supplementary Table 2, Supplementary Figure 3).

83

84 Previous studies have shown a correlation between host gene expression and circulating  
85 parasitemia[23, 24], suggesting that this might explain some of the differences in gene expression  
86 between SM and UM. However peripheral blood parasite measurements underestimate the total  
87 number of parasites in the body because parasitized red blood cells can also become sequestered,  
88 accumulating in small blood vessels rather than remaining in circulation[12, 25]. The parasite  
89 protein, *P. falciparum* histidine rich protein 2 (PfHRP2), can be used as a plasma biomarker of total  
90 parasite load and is more strongly associated with severity[7, 8, 10] (Supplementary Table 1) and  
91 death[8, 10]. Therefore we examined the association of host and parasite gene expression with both  
92 circulating parasite density and PfHRP2 (restricting comparisons to subjects with data for both). We  
93 found 1886 human genes significantly (FDR  $P < 0.05$ ) correlated with log parasite density and 616  
94 significantly correlated with log PfHRP2 (102 common to both), whilst only 2 and 10 parasite genes  
95 were significant in the corresponding analyses (none common to both) (Supplementary Tables 4 and  
96 5). We then asked to what extent the differences between SM and UM phenotypes were dependent  
97 on parasite load. The number of human SM vs UM DEGs remained almost unchanged before and  
98 after adjustment for parasite density but was reduced by 98.6% after adjustment for PfHRP2, whilst  
99 parasite DEGs changed much less after the same adjustments (Figure 2c, Supplementary Tables 2  
100 and 3). Findings were similar when adjusting for parasite load in comparisons of each of the SM  
101 subtypes vs UM (Supplementary Tables 2 and 3).

102

103 Genes associated with severity after adjustment for parasite load may include determinants of  
104 susceptibility to severe disease. Of particular interest amongst these, MMP8 (also known as

105 collagenase 1) is a metallopeptidase which causes endothelial barrier damage in several infection  
106 models[26, 27]; *AZI2* (also known as NF-Kappa-B-Activating Kinase-Associated Protein 1, NAP1)  
107 encodes a regulator of the type 1 interferon response[28], a pathway which is known to control  
108 severity of disease in rodent malaria models[29]; whilst CX3CR1 is the receptor for fractalkine (a  
109 biomarker of CM in humans[30]) and a marker for a subset of monocytes which are particularly  
110 efficient at killing malaria parasites[31].

111

112 Next we performed pathway analyses to better understand the biological functions of the significant  
113 genes in the preceding analyses. Human genes correlated with log parasite density were particularly  
114 enriched in pathways related to translation (especially exported proteins), oxidative phosphorylation  
115 and ubiquitination (Fig 2d, Supplementary Table 6), with predicted upstream regulation by RICTOR  
116 (RPTOR independent companion of MTOR complex 2), HNF4A (hepatocyte nuclear factor 4 alpha)  
117 and XBP1 (X-box binding protein 1; Supplementary Table 7). Genes correlated with log PfHRP2 were  
118 particularly enriched in inflammatory and immune response functions (specifically innate response  
119 and type 1 interferon, Fig 2d, Supplementary Table 6), with predicted regulation by IFN- $\gamma$ , TGM2  
120 (transglutaminase 2) and IFN- $\alpha$ 2 (Supplementary Table 7). Some of these immune response  
121 functions were also correlated with parasite density but were not significantly enriched because of  
122 the larger denominator in this analysis (Fig 2d, Supplementary Tables 6). We compared human DEGs  
123 from SM vs UM comparisons without adjustment and with adjustment for parasite density or  
124 PfHRP2 (Figure 2e, Supplementary Table 6)). In unadjusted analyses human genes were particularly  
125 enriched in processes controlling protein synthesis and targeting to the endoplasmic reticulum, cell  
126 stress and immune response and the most significant predicted upstream regulators were CSF3  
127 (colony stimulating factor 3, also known as granulocyte colony stimulating factor, GCSF), FAS (Fas cell  
128 surface death receptor) and PTGER2 (Prostaglandin E receptor 2, Supplementary Table 7 ). After  
129 adjustment for parasite density we observed little change in pathway enrichment associated with  
130 severe malaria, whilst adjustment for PfHRP2 reduced all pathway enrichments. In contrast parasite

131 pathways were less influenced by adjustment for either parasite density or PfHRP2 (Fig 2f,  
132 Supplementary Table 8), the most consistently significant being RNA processing, protein transport,  
133 and hemoglobin catabolism. Findings were broadly similar in corresponding analyses for all subtypes  
134 of SM (Supplementary Figure 4, Supplementary Table 6), with the exception that adjustment for  
135 parasite density produced a 5-fold increase in the number of DEGs in the hyperlactatemia (HL) vs  
136 UM comparison. This intriguing finding suggests that the response to circulating parasites in these  
137 groups with similar parasite density (Supplementary Table 1) may partially mask differences in gene  
138 expression associated with hyperlactatemia.

139

140 To further explore pathophysiology we examined the correlation of human and parasite gene  
141 expression with lactate and hemoglobin concentrations and platelet count[32]. 1012 human genes  
142 were significantly correlated with lactate concentration, reducing by half after adjustment for  
143 parasite density and by 95% after adjustment for PfHRP2 (Fig 2c,g, Supplementary Table 4). Immune  
144 response pathways were prominent in unadjusted analysis (the negative association with type 1  
145 interferon being particularly notable), and the most significant predicted upstream regulators were  
146 interferon- $\gamma$ , interferon- $\alpha$ , and TNF. Adjustment for parasite density retained most enrichment terms  
147 whilst adjustment for PfHRP2 removed almost all significant enrichment (Fig 2g, Supplementary  
148 Table 6) but remaining genes included *PKM* (encoding the glycolytic enzyme pyruvate kinase M) and  
149 *GYS1* (encoding the glycogenic enzyme glycogen synthase 1) (Supplementary Table 4). These findings  
150 suggest hyperlactatemia is driven by the parasite load-dependent inflammatory response, but also  
151 influenced by some parasite load-independent variation in control of host metabolism. 100 parasite  
152 genes were significantly correlated with lactate, with much less dependency on parasite load (Fig  
153 2c,h, Supplementary Table 5). Unexpectedly these included two glycolysis genes (hexokinase and  
154 acetylCoA synthetase), negatively correlated with lactate (Fig 2h, Supplementary Table 9), suggesting  
155 that rather than parasite-derived lactate driving hyperlactatemia, host-derived lactate may  
156 negatively regulate parasite glycolysis. Compared to lactate, platelet count was associated with

157 fewer human genes, and these were less dependent on parasite load (Fig 2c,i, Supplementary Table  
158 4). The most enriched pathways also differed considerably, with nucleosome assembly  
159 (predominantly histone genes), coagulation, and response to wounding genes, all negatively  
160 correlated with platelet count (Fig 2i), and the most significant predicted upstream regulators being  
161 IL13, RB1 (RB transcriptional corepressor 1), and IL1RN (Supplementary Table 7). Activation of  
162 coagulation pathways is increasingly recognised in severe malaria[33, 34], but free histones can also  
163 induce thrombocytopenia[35] and may be relevant in malaria. No human genes and few parasite  
164 genes were associated hemoglobin concentration in any analyses and only one parasite gene was  
165 associated with platelet count (Figure 2c, Supplementary Table 4,5).

166

167 Taken together the preceding findings indicate that total parasite load is the dominant driver of host  
168 leukocyte gene expression in malaria, particularly inflammatory and immune response genes, and  
169 differences in parasite load explain almost all of the human gene expression differences between SM  
170 and UM. Despite this, specific parasite load-dependent pathways were differentially associated with  
171 distinct aspects of systemic pathophysiology, and circulating parasites correlated with patterns of  
172 host gene expression suggesting that parasite localization substantially alters the host-parasite  
173 interaction. In contrast to host genes, parasite gene expression showed little association with  
174 parasite load, implying that the non-polymorphic genes differentially expressed between SM and  
175 UM do not directly contribute to high parasite load, but may contribute to other aspects of  
176 pathogenesis or simply reflect parasite responses to the perturbed host environment.

177

178 Whilst these independent analyses of host and parasite gene expression associations with severity  
179 are enlightening, dual-RNA sequencing can also be used to identify molecular interactions within and  
180 between species and their associations with severity[36]. Expression of groups of genes with  
181 common functional roles are often highly correlated and can be identified through co-expression  
182 network analysis[37]. We applied this methodology to identify correlated modules of genes, which

183 could originate from either or both species and were named according to the “hub gene” which has  
184 the greatest connectivity within the module. First we analysed all subjects together and generated a  
185 network with 26 modules (Fig 3 and Supplementary Table 9): 10 containing exclusively human genes,  
186 5 exclusively parasite genes, and 11 with both human and parasite genes (although most of these  
187 were highly skewed to a single species). All modules showed significant functional enrichments  
188 regardless of host or parasite origin. The composite expression of genes within a module can be  
189 described by a module eigengene value and, as expected, there were significant associations  
190 between module eigengene values and severity, parasite load, and laboratory parameters (Figure 3).  
191 Only the *HSPH1* (heat shock protein family H (Hsp110) member 1) module contained more than 10  
192 genes from both human and parasite, strongly enriched in human heat shock response genes and  
193 parasite RNA metabolism genes, perhaps indicating that these parasite genes particularly promote  
194 human cell stress. Some host-dominated and parasite-dominated modules were also highly  
195 correlated with each other, most notably the *RPL24* (ribosomal protein L24) module (highly enriched  
196 in translation pathways) was strongly correlated with the remarkably homologous *PF3D7\_0721600*  
197 (putative 40S ribosomal protein S5) parasite module. We excluded read mapping errors as an  
198 explanation for this, and suggest that this indicates co-regulation of conserved host and parasite  
199 translation machinery. Furthermore, most of these genes were also differentially expressed between  
200 SM and UM, perhaps indicating a “molecular arms race” between parasite and host to synthesise  
201 proteins which may, in excess, contribute to collateral tissue damage.

202

203 Co-expression network modules can be used as units of analysis, affording considerable dimension  
204 reduction for whole-genome expression data. We used module eigengene values[37, 38] and  
205 parasite load (with which many modules were correlated, Fig 3) in linear regression models to  
206 determine the best within-sample predictors of severity, starting with all significant univariate  
207 associations and proceeding by backward selection (Supplementary Table 10). The best multivariate  
208 model combined *MMP8*, *OAS1* (2'-5'-oligoadenylate synthetase 1) and *LYSMD3* (LysM, putative



209 peptidoglycan-binding, domain containing 3) module eigengenes, but not parasite load. Interestingly  
210 these modules represent distinct aspects of the immune response: the *MMP8* module, highly  
211 enriched in defence response genes with predicted upstream regulators CEBPA (CCAAT/enhancer  
212 binding protein alpha, a myeloid transcription factor) and CSF3, likely reflects granulopoiesis[22]; the  
213 *OAS1* module is highly enriched for type 1 interferon response genes; the small *LYSMD3* module,  
214 with limited GO enrichment, contains a functional network around interferon- $\gamma$  (Supplementary  
215 Figure 5). The direction of association of the *OAS1* module with severity changed from negative in  
216 univariate analysis to positive in the multivariate analysis, suggesting that inadequate  
217 downregulation of the type-1 interferon response in conjunction with upregulation of granulopoiesis  
218 and interferon- $\gamma$  signalling may contribute to pathogenesis.

219

220 Considering all subjects together for generation of co-expression networks maximises power to  
221 detect consistently co-regulated genes but may not identify sets of genes where co-regulation is  
222 altered by severity. For this reason we also created separate co-expression networks for UM and SM  
223 and compared the modules to identify differential co-expression (Fig 4, Supplementary Table 11).  
224 Eight modules showed significant preservation between networks, seven were partially preserved,  
225 and two were unique to SM (Figure 4a, Supplementary Table 11). Partial preservation was common  
226 amongst modules comprised predominantly from human or parasite genes (Figure 4a,b), and  
227 module preservation was not dependent on the proportion of module genes differentially expressed  
228 between SM and UM (Figure 4a,c). Again, a *MMP8* module was identified (exclusively human genes,  
229 many encoding neutrophil granule and phagosome components), unique to SM with 38% of genes  
230 significantly differentially expressed between SM and UM, enriched in host defence pathways  
231 (Supplementary Table 11) and predicted to be regulated by CEBPA, CSF3 and TNF. These findings  
232 strongly suggest this module represents emergency granulopoiesis[22] and mark this as a specific  
233 feature of SM. The *TIPRL* (TOR Signaling Pathway Regulator) module (99.2% human genes) was also  
234 unique to SM but contained very few (1.3%) DEGs, had limited GO enrichment (Supplementary Table

235 11), and the most significant predicted upstream regulator was the transcription factor HNF4A. Both  
236 TIPRL and HNF4A have regulatory roles in metabolic, inflammatory and apoptosis signal pathways,  
237 so the minimal change in expression of this module may represent an aberrant response in SM.  
238 Amongst the partially preserved modules we found evidence that host and parasite translation  
239 pathways were more tightly co-regulated in SM than UM, genes being distributed across fewer  
240 modules in SM (Fig 4a, Supplementary Table 11).

241

## 242 **Discussion**

243 We have shown that dual-RNA sequencing can be used to identify systemic host-pathogen  
244 interactions and potential pathogenic mechanisms associated with severe infection in humans. The  
245 differences in human and parasite gene expression between SM and UM were much clearer after  
246 adjusting for heterogeneity of leukocyte population and parasite developmental stage. Although the  
247 importance of accounting for such variation is well recognised[14], it has rarely been done in malaria  
248 or other infectious disease transcriptomic studies.

249 Our most striking finding came from integrating parasite load with global gene expression, revealing  
250 the overriding effect of parasite load on the differences in human gene expression between SM and  
251 UM. Previous studies have examined the association between human gene expression and  
252 circulating parasitemia[13, 23, 24], but we found that estimation of total body parasite load was  
253 necessary to appreciate the full effect on host response. Our findings imply that SM is not the  
254 consequence of an excessive host response, but that there is an appropriate host response to an  
255 excessive pathogen load. This has important implications for other infectious disease, immunology,  
256 and pathogenesis research in humans. Total body pathogen load is much harder to measure in other  
257 infections in humans[39], yet failure to account for it may lead to misinterpretation of associations  
258 between host factors and severity or protection.

259 Despite the dominant effect of parasite load, we found that specific sets of genes induced by  
260 infection were associated with different pathophysiological consequences of malaria. Distinct sets of

261 genes were correlated lactate concentration and platelet count, and associated with different  
262 clinical presentations of SM. Alternative analytical approaches repeatedly identified the association  
263 of genes expressed during neutrophil granulopoiesis (such as *MMP8*) and translation pathways with  
264 severe outcomes. There is plentiful evidence that neutrophil granule proteins are released in severe  
265 malaria[40, 41], can impair vascular endothelial functions such as barrier integrity[26, 27], and may  
266 therefore have a direct role in the pathogenesis of SM. Unfortunately neutrophil related signatures  
267 are not differentially expressed in the whole blood transcriptome of the widely used rodent  
268 experimental cerebral malaria model[42], which means that experimental testing of the role of  
269 neutrophils may be challenging.

270 We observed an intriguing relationship between type 1 interferon responses and severity, which  
271 may help to tie together data from previous observations in humans and animal models. A previous  
272 small study found higher expression of type-1 interferon response genes in UM than SM and  
273 suggested that this may be protective against developing SM[43]. However we found that type-1  
274 interferon response genes were negatively correlated with parasite load, indicating that  
275 downregulation with increasing parasite load (and severity) is a more likely explanation. When we  
276 performed multivariate analyses using gene expression modules to explain severity, our results  
277 suggested that insufficient downregulation of type 1 interferons was in fact associated with severity.  
278 This would be more consistent with results in several animal models where genetic or antibody-  
279 mediated ablation of type-1 interferon signalling improves outcome[44-47].

280 The role of translation pathways is more speculative, but co-regulation of these genes between host  
281 and parasite, which becomes tighter in more severe disease, implies that there may be an inter-  
282 species feedback loop. Increased translation is important for production of host defence effector  
283 proteins[48] and parasite proteins which enable survival[49]. Perhaps, as parasite load increases the  
284 host response increases, the parasite produces more proteins necessary to survive, and the cycle  
285 amplifies until parasite load and host response cause host organ damage and severe disease.

286 In addition to translation-related genes, we also identified hundreds of other parasite genes which  
287 were associated with severe disease. Many of these genes have as yet unknown function. However  
288 the enrichment of genes involved in protein transport, for example, suggests there may be layers of  
289 control which determine parasite protein export into the host cell and the molecular host-parasite  
290 interactions which predispose to SM. Some of these aspects of parasite gene regulation may only be  
291 appreciated *in vivo*, in the parasite's natural environment.

292 The data we have generated and comprehensive analyses we have performed provide a unique and  
293 valuable resource for the research community. These should be launch points for future studies  
294 using alternative approaches to assess whether the mechanisms we have implicated through gene  
295 expression do indeed play causal roles in SM and may be targets for much needed adjunctive  
296 therapies.

297 **Methods**

298 **Subjects and samples**

299 Gambian children (under 16 years old) with *P. falciparum* malaria were recruited from three peri-  
300 urban health centres, The MRC Gate Clinic, Brikama Health Centre, and The Jammeh Foundation for  
301 Peace Hospital, Serekunda, as part of a larger study of severe malaria[7, 50, 51]. Informed consent  
302 was obtained from the child's parent or legal guardian for collection and subsequent use of samples.  
303 The study was approved by the Gambian Government / MRC Laboratories Joint Ethics Committee.  
304 All children underwent full clinical examination and were managed in accordance with the Gambian  
305 government guidelines. Malaria was defined by the occurrence of fever in the last 48 hours before  
306 recruitment and >5000 asexual parasites/ $\mu$ L in the peripheral blood. Subjects were further  
307 categorized into different severe malaria phenotypes using modified World Health Organization  
308 criteria: cerebral malaria (CM) was defined as Blantyre Coma Score (BCS) of 1 or 2, or a BCS of 3 if  
309 the motor response was 1, AND no hypoglycaemia, no rapid improvement in response to fluid  
310 resuscitation, no suspicion of meningitis; hyperlactatemia (HL), blood lactate concentration >  
311 5mmol/L; both CM and HL (CH)[7]. At the time of presentation to the clinic, prior to any antimalarial  
312 treatment or blood transfusion, capillary blood was used for measurement of lactate and glucose  
313 concentrations and thick and thin blood films, venous blood was collected into EDTA for sickle cell  
314 screen and full blood count, PAXgene blood RNA tube (BD), and sodium heparin (BD) for plasma  
315 separation[50]. Parasitemia was calculated using 50 high power fields on Giemsa-stained thin blood  
316 smears. Plasma *P. falciparum* histidine-rich protein II (PfHRP2) was measured by ELISA (Cellabs)[7].  
  
317 For the present study we used 46 subjects selected from those with  $\geq 1\mu$ g RNA available which  
318 showed no / minimal evidence of degradation on visual inspection of a Bioanalyser (Agilent) trace  
319 (RNA integrity number calculations are not valid for dual species RNA analysis). To reduce potential  
320 confounding we aimed to frequency match subjects between SM and UM groups as closely as  
321 possible by age and gender, and if there remained a choice of samples available we selected those

322 with the most complete additional clinical and laboratory data. For UM samples we aimed to include  
323 an equal number with parasitemia above and below 5% (to maximise the chance of obtaining  
324 parasite reads in some of the subjects). For SM samples we aimed to include subjects with each of  
325 the common SM phenotypes seen in this part of the Gambia in approximately equal numbers,  
326 although final numbers were determined by availability and quality of RNA. Detailed information  
327 about the study subjects is shown in Supplementary Table 1 and Supplementary Dataset 1.  
328 Characteristics were compared between subject groups using one-way ANOVA for continuous data  
329 and Fisher's exact test for categorical data.

### 330 **RNA sequencing**

331 Total RNA was extracted using the PAXgene Blood RNA kit (BD). Libraries were prepared from 1µg of  
332 total RNA using the ScriptSeq v2 RNA-seq library preparation kit (Illumina) with additional steps to  
333 remove ribosomal RNA (rRNA) and globin messenger RNA (mRNA) using the Globin-Zero Gold kit  
334 (Epicentre). Strand-specific libraries were sequenced using the 2x100 bp protocol with an Illumina  
335 HiSeq 2500 instrument. In order to eliminate batch effects, samples were randomized for the order  
336 of library preparation. For sequencing, 5-6 samples were run per lane, and each lane contained at  
337 least one sample from each disease type, randomly allocated in a block design. Library preparation  
338 and sequencing were carried out by Exeter University sequencing service.

### 339 **Genomes and RNA annotations**

340 Human reference genome (hg38) was obtained from UCSC genome browser  
341 (<http://genome.ucsc.edu/>) and *P. falciparum* reference genome (release 24) was obtained from  
342 PlasmoDB (<http://plasmodb.org/>). Human gene annotation was obtained from GENCODE (release  
343 22) (<http://genencodegenes.org/releases/>) and *P. falciparum* gene annotation from PlasmoDB (release  
344 24) (<http://plasmodb.org/>).

### 345 **Read Mapping and quantification**

346 RNA-seq data was mapped to the combined genomic index containing both human and *P.*  
347 *falciparum* genomes using the splice-aware STAR aligner, allowing up to 8 mismatches for each  
348 paired-end read[52]. Reads were extracted from the output BAM file to separate parasite-mapped  
349 reads from human-mapped reads. Reads mapping to both genomes were counted for each sample  
350 and removed. BAM files were sorted, read groups replaced with a single new read group and all  
351 reads assigned to it, and indexed to run RNA-SeQC, a tool for computing quality control metrics for  
352 RNA-seq data[53]. HTSeq-count was used to count the reads mapped to exons with the parameter “-  
353 m union”[54]. Only uniquely mapping reads were counted.

354 Since our analysis of *P. falciparum* gene expression was reliant on a reference genome, families of  
355 highly polymorphic *var*, *stevor*, and *rifin* genes were removed from downstream analyses as these  
356 exhibit great sequence diversity between parasites and are likely to be incorrectly characterized[12].  
357 Additional highly polymorphic regions within the *P. falciparum* genome which might also be  
358 incorrectly characterized were identified using schizont stage RNA-seq data from 9 clinical isolates  
359 (Duffy et al., manuscript submitted). In total, 139 genes were identified with highly polymorphic  
360 regions. A reference GTF file containing *P. falciparum* gene annotations was modified to remove  
361 these regions without removing the genes, and the resulting read count data generated using the  
362 modified GTF file was used for downstream analysis.

### 363 **Outlier identification**

364 With the R package edgeR, raw read counts of each data set were normalized using a trimmed mean  
365 of M-values (TMM), which takes into account the library size and the RNA composition of the input  
366 data[55]. A multi-dimensional scaling (MDS) plot was used to identify the distances between  
367 samples that correspond to leading biological coefficient of variation. Up to the 6th dimension of  
368 MDS was plotted to fully observe the variation between samples, with two dimensions visualized at  
369 a time in scatter plot format. Three parasite samples were consistently found to be positioned away  
370 from other samples in each pair of dimensions, indicating outliers. This was further supported by low

371 correlations observed between either of these outliers with other samples. These three samples  
372 were excluded from further parasite gene expression analysis: one sample (HL\_478) had very low  
373 parasite reads making estimation of gene expression impossible and the other two samples (CH\_285  
374 and UM\_589) were conspicuous outliers on MDS plots, possibly due to imperfect library preparation.

### 375 **Deconvolution analysis**

376 To account for inter-individual variation in the proportions of different types of blood leukocyte, and  
377 for variation in the distribution of circulating parasites through the intraerythrocytic developmental  
378 cycle, deconvolution analysis was performed on RNA-seq data using CellCODE[15]. This uses a multi-  
379 step statistical framework to compute the relative differences in cell proportion represented as  
380 surrogate proportion variables (SPVs). It requires a reference data set that contains gene expression  
381 profiles for each cell type of interest. Five major immune cell populations were selected from  
382 Immune Response In Silico (IRIS)[56] to constitute the human reference data set: neutrophil,  
383 monocyte, CD4+ T-cell, CD8+ T-cell, and B-cell. Fragments Per Kilobase of transcript per Million  
384 mapped reads (FPKM) values were calculated from human RNA-seq data and log-transformed to  
385 simulate a microarray data set. For the parasite reference data set, RNA-seq data sets were obtained  
386 for four specific stages in the parasite asexual and sexual stage (0 hour, 24 hour, 48 hour, and  
387 gametocyte stage V)[16, 18], normalized by relative library sizes of samples (i.e. size factors) using  
388 edgeR. An identical normalization method was also applied for the input parasite RNA-seq data. A  
389 trial-and-error approach was taken to obtain the optimum SPV values for each cell-type. For human  
390 deconvolution, a cutoff value of 1.2 and a maximum number of marker genes of 50 appeared  
391 optimal. For parasite deconvolution, a cutoff value of 1.7 and a maximum number of marker genes  
392 of 50 appeared optimal.

393 Validation of CellCODE for *P. falciparum* developmental stage deconvolution (for which its use has  
394 not previously been reported) was performed by comparison with previously reported “stage-  
395 specific” marker genes[57] and by assessing performance in synthetic data sets constructed by



396 mixing together in varying proportions randomly selected reads from RNA-seq reference  
397 datasets[16, 18] of the different parasite developmental stages.

### 398 **Differential gene expression and linear regression analysis**

399 Prior to carrying out any downstream analyses genes with very low TMM-normalized read counts (<  
400 5 counts-per-million (cpm) in < 3 samples and undetected in the remainder) were excluded. The  
401 generalized linear model tool in edgeR was employed to perform differential gene expression  
402 analysis (DGEA) between disease groups with adjustment for leukocyte and parasite SPVs, and in  
403 subsequent analyses additional adjustment for log parasite density and log PfHRP2.

404 Linear regression analysis was performed in edgeR to identify genes significantly associated with  
405 clinical variables of interest. Input gene expression values included adjustment for SPVs. The  
406 variables considered were: log PfHRP2, log parasite density, lactate concentration, platelet counts,  
407 and hemoglobin concentration. Additional analysis for lactate, platelets and hemoglobin were  
408 conducted including adjustment for log parasite density and log PfHRP2.

409 In both DGEA and linear regression analyses, false Discovery Rate (FDR) was computed for each  
410 individual analysis using the Benjamini-Hochberg procedure[58]. Genes with FDR below 0.05 were  
411 considered to be differentially expressed.

### 412 **Gene ontology and KEGG pathway enrichment analysis**

413 Gene ontology (GO) terms for genes were obtained from Bioconductor package "org.Hs.eg.db" for  
414 human and "org.Pf.plasmo.db" for parasite. Input gene lists were significantly differentially  
415 expressed genes or genes that were significantly associated with laboratory variables. Fisher's exact  
416 test was used to identify significantly over-represented GO terms from these gene lists. The  
417 background sets for each species consisted of all expressed genes detected in the data set with the  
418 exclusion of those with very low expression as described above. Enrichment analysis for biological  
419 process terms was carried out using the "goana()" function in edgeR. The least redundant GO terms  
420 with greatest significance in each analysis were identified for reporting using the tool REVIGO[59].

421 Ingenuity Pathway Analysis (Qiagen) was used for prediction of upstream regulators of groups of  
422 differentially expressed genes, and to identify functional networks.

## 423 **Construction of a coexpression network**

424 The weighted gene coexpression network analysis (WGCNA) tool was used to construct a gene  
425 coexpression network[38]. The input data for WGCNA was read counts for each gene feature  
426 normalized using TMM method and then adjusted for SPVs using the command  
427 "removeBatchEffect()" from the R package edgeR. Both human and parasite expression data were  
428 analyzed together as a single set of genes for each subject. In order to comprehensively study the  
429 relationships between genes, two sets of networks were created: one with all samples from SM and  
430 UM groups, and the other with two separate sub-networks, generated from samples from SM and  
431 UM groups respectively. Network creation was conducted following the WGCNA tool guidelines:

432 1) Hierarchical clustering was performed at a sample level to detect outliers based on the WGCNA  
433 tool threshold, which were removed from the subsequent network generation (HL\_171 and  
434 UM\_492).

435 2) An appropriate soft-thresholding power (b) was chosen by applying the scale-free topology  
436 criterion. This was such that the power value enables the resulting gene network to satisfy the scale-  
437 free topology of approximately ( $R^2 > 0.80$ ).

438 3) Adjacency, which represents the connection strength of two genes in a network, was calculated.  
439 Coexpression similarity was calculated by taking the absolute value of the correlation coefficient,  
440 multiplying by 0.5 and adding 0.5 to create a signed network, where the presence of strongly  
441 negatively correlated gene pairs is downsized.

442 4) The adjacency matrix was transformed into a topological overlap matrix (TOM) in order to  
443 minimize the effects of spurious associations and noise in the network.

444 5) Hierarchical clustering on TOM dissimilarity was done to create hierarchical clustering tree of  
445 genes.

446 6) The dynamic tree cut method was used to group the genes that are highly correlated with one  
447 another into gene modules where minimum module size and the tree height at which genes below  
448 the height is grouped together were specified.

449 7) Module eigengene values for each module were calculated, which represents the overall gene  
450 expression profile of a module. Correlation analysis between modules was performed using  
451 eigengene values to identify modules with high similarity, which were then merged together.

452 The resulting network consisted of genes (represented as nodes in the network) and correlations  
453 between genes (represented as edges in the network), and highly correlated genes grouped  
454 together into modules. To characterize the gene network, several analysis steps were carried out.  
455 The most connected genes in each module were identified as the hub genes. Based on the module  
456 eigengene value, the connections between modules were determined. Pearson correlation analysis  
457 between module eigengene values and clinical variables was performed to identify gene clusters  
458 that are highly associated with clinical traits. Gene set enrichment analysis was performed on each  
459 module to identify significantly enriched GO terms. This data was summarised using OmicCircos[60].

460 From two separate sub-networks generated from SM and UM groups respectively, the preservation  
461 of gene connections across SM and UM groups was determined by assessing an overlap of genes for  
462 each module pair (from SM and UM sub-networks respectively), the significance of overlap was  
463 measured using the hypergeometric test. For each significantly preserved module pair, the hub  
464 genes and the significantly enriched GO terms were compared.

465 The gene network was exported to Cytoscape (<http://www.cytoscape.org/>) for visualisation. Only  
466 gene pairs with adjacency value of 0.03 or higher were exported to remove genes with low  
467 connections from the network visualization. SM and UM sub-networks were exported separately  
468 and subsequently combined into a single network using the Cytoscape embedded tool "Merge". By  
469 doing so, duplicate genes representing overlap between SM and UM sub-networks were removed,  
470 and connections between genes remained intact such that genes that can only be found on SM sub-  
471 network and also connected to the genes that can be found on both networks were not connected  
472 to the genes that can be found on UM sub-network and also connected to the same overlapping  
473 genes.

#### 474 **Logistic regression for association of module eigengenes with severity**

475 Logistic regression was performed using the glm package in R to identify module eigengene values  
476 with univariate association with severity. All modules with significant univariate associations

477 (P<0.01) in addition to log PfHRP2 concentration were used in backward selection to identify the  
478 best multivariate model in which all terms were significant.

479

#### 480 **Data availability**

481 Sequence data that support the findings of this study will be deposited in ArrayExpress with the  
482 accession codes made available at the time of publication. Source data for Supplementary Table 1  
483 are provided with the paper as Supplementary Dataset 1.

484

#### 485 **Acknowledgements**

486 This work was funded by the UK Medical Research Council (MRC) and the UK Department for  
487 International Development (DFID) under the MRC/DFID Concordat agreement and is also part of the  
488 EDCTP2 programme supported by the European Union (MR/L006529/1), MRC core funding of the  
489 MRC Gambia Unit (MRCG), and Wellcome Trust (098051). We are grateful to the study subjects, staff  
490 at MRCG, Jammeh Foundation for Peace Hospital, and Brikama Health Centre; Konrad Paszkiewicz  
491 and staff at Exeter Sequencing Service at the University of Exeter (supported by Medical Research  
492 Council Clinical Infrastructure award (MR/M008924/1), Wellcome Trust Institutional Strategic  
493 Support Fund (WT097835MF), Wellcome Trust Multi User Equipment Award (WT101650MA) and  
494 BBSRC LOLA award (BB/K003240/1)).

495

#### 496 **Author contributions**

497 AJC, ML and DJC conceived the study; HJL, TDO and AG performed formal analysis; MW and AJC  
498 performed investigations on clinical samples; MW, DJC, DN and LBS provided samples; DJC, TDO and  
499 LBS provided methodology; AJC and HJL wrote the original draft; all authors contributed to review  
500 and editing of the manuscript; LJC, DJC, ML, TDO and AJC provided supervision; AJC obtained  
501 funding.

502

#### 503 **Competing financial interests**

504 The authors declare no competing financial interests.

505

506 **Materials & Correspondence**

507 Correspondence should be addressed to Dr Aubrey Cunnington, Clinical Senior Lecturer,

508 Section of Paediatrics, Department of Medicine, Imperial College London (St Mary's Campus)

509 231, Medical School Building, Norfolk Place, London W2 1PG. [a.cunnington@imperial.ac.uk](mailto:a.cunnington@imperial.ac.uk)

510 **References**

- 511 1. Phillips MA, Burrows JN, Manyando C, van Huijsduijnen RH, Van Voorhis WC, Wells TNC.  
512 Malaria. *Nat Rev Dis Primers*. 2017;3:17050. doi: 10.1038/nrdp.2017.50. PubMed PMID: 28770814.
- 513 2. Blasco B, Leroy D, Fidock DA. Antimalarial drug resistance: linking *Plasmodium falciparum*  
514 parasite biology to the clinic. *Nat Med*. 2017;23(8):917-28. doi: 10.1038/nm.4381. PubMed PMID:  
515 28777791.
- 516 3. Ranson H, Lissenden N. Insecticide Resistance in African *Anopheles* Mosquitoes: A  
517 Worsening Situation that Needs Urgent Action to Maintain Malaria Control. *Trends Parasitol*.  
518 2016;32(3):187-96. doi: 10.1016/j.pt.2015.11.010. PubMed PMID: 26826784.
- 519 4. Churcher TS, Lissenden N, Griffin JT, Worrall E, Ranson H. The impact of pyrethroid  
520 resistance on the efficacy and effectiveness of bednets for malaria control in Africa. *eLife*. 2016;5.  
521 doi: 10.7554/eLife.16090. PubMed PMID: 27547988; PubMed Central PMCID: PMC5025277.
- 522 5. Cunnington AJ, Walther M, Riley EM. Piecing together the puzzle of severe malaria. *Sci Transl*  
523 *Med*. 2013;5(211):211ps18. doi: 10.1126/scitranslmed.3007432. PubMed PMID: 24225942.
- 524 6. Wassmer SC, Grau GE. Severe malaria: what's new on the pathogenesis front? *Int J Parasitol*.  
525 2017;47(2-3):145-52. doi: 10.1016/j.ijpara.2016.08.002. PubMed PMID: 27670365; PubMed Central  
526 PMCID: PMC5285481.
- 527 7. Cunnington AJ, Bretscher MT, Nogaro SI, Riley EM, Walther M. Comparison of parasite  
528 sequestration in uncomplicated and severe childhood *Plasmodium falciparum* malaria. *J Infect*.  
529 2013;67(3):220-30. doi: 10.1016/j.jinf.2013.04.013. PubMed PMID: 23623771; PubMed Central  
530 PMCID: PMC3744804.
- 531 8. Hendriksen IC, Mwanga-Amumpaire J, von Seidlein L, Mtove G, White LJ, Olaosebikan R, et  
532 al. Diagnosing severe *falciparum* malaria in parasitaemic African children: a prospective evaluation of  
533 plasma PfHRP2 measurement. *PLoS Med*. 2012;9(8):e1001297. Epub 2012/08/29. doi:  
534 10.1371/journal.pmed.1001297. PubMed PMID: 22927801; PubMed Central PMCID: PMC3424256.

- 535 9. Hendriksen IC, White LJ, Veenemans J, Mtove G, Woodrow C, Amos B, et al. Defining  
536 falciparum-malaria-attributable severe febrile illness in moderate-to-high transmission settings on  
537 the basis of plasma PfHRP2 concentration. *J Infect Dis.* 2013;207(2):351-61. doi:  
538 10.1093/infdis/jis675. PubMed PMID: 23136222; PubMed Central PMCID: PMC3532834.
- 539 10. Dondorp AM, Desakorn V, Pongtavornpinyo W, Sahassananda D, Silamut K, Chotivanich K, et  
540 al. Estimation of the total parasite biomass in acute falciparum malaria from plasma PfHRP2. *PLoS*  
541 *Med.* 2005;2(8):e204. Epub 2005/08/18. doi: 04-PLME-RA-0297R2 [pii]  
542 10.1371/journal.pmed.0020204. PubMed PMID: 16104831; PubMed Central PMCID: PMC1188247.
- 543 11. Craig AG, Grau GE, Janse C, Kazura JW, Milner D, Barnwell JW, et al. The role of animal  
544 models for research on severe malaria. *PLoS Pathog.* 2012;8(2):e1002401. doi:  
545 10.1371/journal.ppat.1002401. PubMed PMID: 22319438; PubMed Central PMCID: PMC3271056.
- 546 12. Wahlgren M, Goel S, Akhouri RR. Variant surface antigens of *Plasmodium falciparum* and  
547 their roles in severe malaria. *Nat Rev Microbiol.* 2017;15(8):479-91. doi: 10.1038/nrmicro.2017.47.  
548 PubMed PMID: 28603279.
- 549 13. Yamagishi J, Natori A, Tolba ME, Mongan AE, Sugimoto C, Katayama T, et al. Interactive  
550 transcriptome analysis of malaria patients and infecting *Plasmodium falciparum*. *Genome Res.*  
551 2014;24(9):1433-44. doi: 10.1101/gr.158980.113. PubMed PMID: 25091627; PubMed Central  
552 PMCID: PMC4158759.
- 553 14. Shen-Orr SS, Gaujoux R. Computational deconvolution: extracting cell type-specific  
554 information from heterogeneous samples. *Curr Opin Immunol.* 2013;25(5):571-8. doi:  
555 10.1016/j.coi.2013.09.015. PubMed PMID: 24148234; PubMed Central PMCID: PMC3874291.
- 556 15. Chikina M, Zaslavsky E, Sealfon SC. CellCODE: a robust latent variable approach to  
557 differential expression analysis for heterogeneous cell populations. *Bioinformatics.*  
558 2015;31(10):1584-91. doi: 10.1093/bioinformatics/btv015. PubMed PMID: 25583121; PubMed  
559 Central PMCID: PMC4426841.

- 560 16. Otto TD, Wilinski D, Assefa S, Keane TM, Sarry LR, Bohme U, et al. New insights into the  
561 blood-stage transcriptome of *Plasmodium falciparum* using RNA-Seq. *Mol Microbiol.* 2010;76(1):12-  
562 24. doi: 10.1111/j.1365-2958.2009.07026.x. PubMed PMID: 20141604; PubMed Central PMCID:  
563 PMC2859250.
- 564 17. Hoeijmakers WA, Bartfai R, Stunnenberg HG. Transcriptome analysis using RNA-Seq.  
565 *Methods Mol Biol.* 2013;923:221-39. doi: 10.1007/978-1-62703-026-7\_15. PubMed PMID:  
566 22990781.
- 567 18. Lopez-Barragan MJ, Lemieux J, Quinones M, Williamson KC, Molina-Cruz A, Cui K, et al.  
568 Directional gene expression and antisense transcripts in sexual and asexual stages of *Plasmodium*  
569 *falciparum*. *BMC Genomics.* 2011;12:587. doi: 10.1186/1471-2164-12-587. PubMed PMID:  
570 22129310; PubMed Central PMCID: PMC3266614.
- 571 19. Blankley S, Berry MP, Graham CM, Bloom CI, Lipman M, O'Garra A. The application of  
572 transcriptional blood signatures to enhance our understanding of the host response to infection: the  
573 example of tuberculosis. *Phil Trans R Soc Lond B, Biol Sci.* 2014;369(1645):20130427. doi:  
574 10.1098/rstb.2013.0427. PubMed PMID: 24821914; PubMed Central PMCID: PMC4024221.
- 575 20. Daily JP, Scanfeld D, Pochet N, Le Roch K, Plouffe D, Kamal M, et al. Distinct physiological  
576 states of *Plasmodium falciparum* in malaria-infected patients. *Nature.* 2007;450(7172):1091-5. doi:  
577 10.1038/nature06311. PubMed PMID: 18046333.
- 578 21. Coleman BI, Duraisingh MT. Transcriptional control and gene silencing in *Plasmodium*  
579 *falciparum*. *Cell Microbiol.* 2008;10(10):1935-46. doi: 10.1111/j.1462-5822.2008.01203.x. PubMed  
580 PMID: 18637022.
- 581 22. Cowland JB, Borregaard N. Granulopoiesis and granules of human neutrophils. *Immunol Rev.*  
582 2016;273(1):11-28. doi: 10.1111/imr.12440. PubMed PMID: 27558325.
- 583 23. Griffiths MJ, Shafi MJ, Popper SJ, Hemingway CA, Kortok MM, Wathen A, et al. Genomewide  
584 analysis of the host response to malaria in Kenyan children. *J Infect Dis.* 2005;191(10):1599-611.  
585 Epub 2005/04/20. doi: JID33481 [pii]



- 586 10.1086/429297. PubMed PMID: 15838786.
- 587 24. Idaghdour Y, Quinlan J, Goulet JP, Berghout J, Gbeha E, Bruat V, et al. Evidence for additive  
588 and interaction effects of host genotype and infection in malaria. *Proc Natl Acad Sci U S A*.  
589 2012;109(42):16786-93. doi: 10.1073/pnas.1204945109. PubMed PMID: 22949651; PubMed Central  
590 PMCID: PMC3479498.
- 591 25. Cunnington AJ, Riley EM, Walther M. Stuck in a rut? Reconsidering the role of parasite  
592 sequestration in severe malaria syndromes. *Trends Parasitol*. 2013;29(12):585-92. doi:  
593 10.1016/j.pt.2013.10.004. PubMed PMID: 24210256; PubMed Central PMCID: PMC3880783.
- 594 26. Vandenbroucke RE, Dejonckheere E, Van Lint P, Demeestere D, Van Wonterghem E,  
595 Vanlaere I, et al. Matrix metalloprotease 8-dependent extracellular matrix cleavage at the blood-CSF  
596 barrier contributes to lethality during systemic inflammatory diseases. *J Neurosci*. 2012;32(29):9805-  
597 16. doi: 10.1523/JNEUROSCI.0967-12.2012. PubMed PMID: 22815495.
- 598 27. Schubert-Unkmeir A, Konrad C, Slanina H, Czapek F, Hebling S, Frosch M. Neisseria  
599 meningitidis induces brain microvascular endothelial cell detachment from the matrix and cleavage  
600 of occludin: a role for MMP-8. *PLoS Pathog*. 2010;6(4):e1000874. doi:  
601 10.1371/journal.ppat.1000874. PubMed PMID: 20442866; PubMed Central PMCID: PMC2861698.
- 602 28. Sasai M, Oshiumi H, Matsumoto M, Inoue N, Fujita F, Nakanishi M, et al. Cutting Edge: NF-  
603 kappaB-activating kinase-associated protein 1 participates in TLR3/Toll-IL-1 homology domain-  
604 containing adapter molecule-1-mediated IFN regulatory factor 3 activation. *J Immunol*.  
605 2005;174(1):27-30. PubMed PMID: 15611223.
- 606 29. Mooney JP, Wassmer SC, Hafalla JC. Type I Interferon in Malaria: A Balancing Act. *Trends*  
607 *Parasitol*. 2017;33(4):257-60. doi: 10.1016/j.pt.2016.12.010. PubMed PMID: 28094200.
- 608 30. Tahar R, Albergaria C, Zeghidour N, Ngane VF, Basco LK, Roussilhon C. Plasma levels of eight  
609 different mediators and their potential as biomarkers of various clinical malaria conditions in African  
610 children. *Malar J*. 2016;15:337. doi: 10.1186/s12936-016-1378-3. PubMed PMID: 27357958; PubMed  
611 Central PMCID: PMC4928328.

- 612 31. Chimma P, Roussilhon C, Sratongno P, Ruangveerayuth R, Pattanapanyasat K, Perignon JL, et  
613 al. A distinct peripheral blood monocyte phenotype is associated with parasite inhibitory activity in  
614 acute uncomplicated *Plasmodium falciparum* malaria. *PLoS Pathog.* 2009;5(10):e1000631. doi:  
615 10.1371/journal.ppat.1000631. PubMed PMID: 19851453; PubMed Central PMCID: PMC2759288.
- 616 32. Cserti-Gazdewich CM, Dhabangi A, Musoke C, Ssewanyana I, Ddungu H, Nakiboneka-  
617 Ssenabulya D, et al. Inter-relationships of cardinal features and outcomes of symptomatic pediatric  
618 *Plasmodium falciparum* malaria in 1,933 children in Kampala, Uganda. *Am J Trop Med Hyg.*  
619 2013;88(4):747-56. doi: 10.4269/ajtmh.12-0668. PubMed PMID: 23358640; PubMed Central PMCID:  
620 PMC3617864.
- 621 33. Moxon CA, Chisala NV, Mzikamanda R, MacCormick I, Harding S, Downey C, et al. Laboratory  
622 evidence of disseminated intravascular coagulation is associated with a fatal outcome in children  
623 with cerebral malaria despite an absence of clinically evident thrombosis or bleeding. *J Thromb*  
624 *Haemost.* 2015;13(9):1653-64. doi: 10.1111/jth.13060. PubMed PMID: 26186686; PubMed Central  
625 PMCID: PMC4605993.
- 626 34. O'Sullivan JM, Preston RJ, O'Regan N, O'Donnell JS. Emerging roles for hemostatic  
627 dysfunction in malaria pathogenesis. *Blood.* 2016;127(19):2281-8. doi: 10.1182/blood-2015-11-  
628 636464. PubMed PMID: 26851291.
- 629 35. Fuchs TA, Bhandari AA, Wagner DD. Histones induce rapid and profound thrombocytopenia  
630 in mice. *Blood.* 2011;118(13):3708-14. doi: 10.1182/blood-2011-01-332676. PubMed PMID:  
631 21700775; PubMed Central PMCID: PMC3186342.
- 632 36. Westermann AJ, Barquist L, Vogel J. Resolving host-pathogen interactions by dual RNA-seq.  
633 *PLoS Pathog.* 2017;13(2):e1006033. doi: 10.1371/journal.ppat.1006033. PubMed PMID: 28207848;  
634 PubMed Central PMCID: PMC5313147.
- 635 37. Fuller TF, Ghazalpour A, Aten JE, Drake TA, Lulis AJ, Horvath S. Weighted gene coexpression  
636 network analysis strategies applied to mouse weight. *Mamm. Genome.* 2007;18(6-7):463-72. doi:  
637 10.1007/s00335-007-9043-3. PubMed PMID: 17668265; PubMed Central PMCID: PMC1998880.

- 638 38. Langfelder P, Horvath S. WGCNA: an R package for weighted correlation network analysis.  
639 BMC Bioinformatics. 2008;9:559. doi: 10.1186/1471-2105-9-559. PubMed PMID: 19114008; PubMed  
640 Central PMCID: PMC2631488.
- 641 39. Cunnington AJ. The importance of pathogen load. PLoS Pathog. 2015;11(1):e1004563. doi:  
642 10.1371/journal.ppat.1004563. PubMed PMID: 25569282; PubMed Central PMCID: PMC4287534.
- 643 40. Dietmann A, Helbok R, Lackner P, Issifou S, Lell B, Matsiegui PB, et al. Matrix  
644 metalloproteinases and their tissue inhibitors (TIMPs) in Plasmodium falciparum malaria: serum  
645 levels of TIMP-1 are associated with disease severity. J Infect Dis. 2008;197(11):1614-20. doi:  
646 10.1086/587943. PubMed PMID: 18700258.
- 647 41. Feintuch CM, Saidi A, Seydel K, Chen G, Goldman-Yassen A, Mita-Mendoza NK, et al.  
648 Activated Neutrophils Are Associated with Pediatric Cerebral Malaria Vasculopathy in Malawian  
649 Children. mBio. 2016;7(1):e01300-15. doi: 10.1128/mBio.01300-15. PubMed PMID: 26884431;  
650 PubMed Central PMCID: PMC4791846.
- 651 42. Oakley MS, Anantharaman V, Venancio TM, Zheng H, Mahajan B, Majam V, et al. Molecular  
652 correlates of experimental cerebral malaria detectable in whole blood. Infect Immun.  
653 2011;79(3):1244-53. doi: 10.1128/IAI.00964-10. PubMed PMID: 21149594; PubMed Central PMCID:  
654 PMC3067492.
- 655 43. Krupka M, Seydel K, Feintuch CM, Yee K, Kim R, Lin CY, et al. Mild Plasmodium falciparum  
656 malaria following an episode of severe malaria is associated with induction of the interferon  
657 pathway in Malawian children. Infect Immun. 2012;80(3):1150-5. doi: 10.1128/IAI.06008-11.  
658 PubMed PMID: 22232187; PubMed Central PMCID: PMC3294667.
- 659 44. Haque A, Best SE, Ammerdorffer A, Desbarrieres L, de Oca MM, Amante FH, et al. Type I  
660 interferons suppress CD4(+) T-cell-dependent parasite control during blood-stage Plasmodium  
661 infection. Eur J Immunol. 2011;41(9):2688-98. doi: 10.1002/eji.201141539. PubMed PMID:  
662 21674481.

- 663 45. Haque A, Best SE, Montes de Oca M, James KR, Ammerdorffer A, Edwards CL, et al. Type I  
664 IFN signaling in CD8- DCs impairs Th1-dependent malaria immunity. *J Clin Invest.* 2014;124(6):2483-  
665 96. doi: 10.1172/JCI70698. PubMed PMID: 24789914; PubMed Central PMCID: PMC4038565.
- 666 46. Sharma S, DeOliveira RB, Kalantari P, Parroche P, Goutagny N, Jiang Z, et al. Innate immune  
667 recognition of an AT-rich stem-loop DNA motif in the *Plasmodium falciparum* genome. *Immunity.*  
668 2011;35(2):194-207. Epub 2011/08/09. doi: S1074-7613(11)00301-3 [pii]  
669 10.1016/j.immuni.2011.05.016. PubMed PMID: 21820332; PubMed Central PMCID: PMC3162998.
- 670 47. Zander RA, Guthmiller JJ, Graham AC, Pope RL, Burke BE, Carr DJ, et al. Type I Interferons  
671 Induce T Regulatory 1 Responses and Restrict Humoral Immunity during Experimental Malaria. *PLoS*  
672 *Pathog.* 2016;12(10):e1005945. doi: 10.1371/journal.ppat.1005945. PubMed PMID: 27732671;  
673 PubMed Central PMCID: PMC5061386.
- 674 48. Arguello RJ, Rodriguez Rodrigues C, Gatti E, Pierre P. Protein synthesis regulation, a pillar of  
675 strength for innate immunity? *Curr Opin Immunol.* 2015;32:28-35. doi: 10.1016/j.coi.2014.12.001.  
676 PubMed PMID: 25553394.
- 677 49. Vembar SS, Droll D, Scherf A. Translational regulation in blood stages of the malaria parasite  
678 *Plasmodium* spp.: systems-wide studies pave the way. *Wiley Interdisciplin Rev RNA.* 2016;7(6):772-  
679 92. doi: 10.1002/wrna.1365. PubMed PMID: 27230797; PubMed Central PMCID: PMC5111744.
- 680 50. Walther M, Jeffries D, Finney OC, Njie M, Ebonyi A, Deininger S, et al. Distinct roles for  
681 FOXP3 and FOXP3 CD4 T cells in regulating cellular immunity to uncomplicated and severe  
682 *Plasmodium falciparum* malaria. *PLoS Pathog.* 2009;5(4):e1000364. Epub 2009/04/04. doi:  
683 10.1371/journal.ppat.1000364. PubMed PMID: 19343213; PubMed Central PMCID: PMC2658808.
- 684 51. Walther M, De Caul A, Aka P, Njie M, Amambua-Ngwa A, Walther B, et al. HMOX1 gene  
685 promoter alleles and high HO-1 levels are associated with severe malaria in Gambian children. *PLoS*  
686 *Pathog.* 2012;8(3):e1002579.

- 687 52. Dobin A, Davis CA, Schlesinger F, Drenkow J, Zaleski C, Jha S, et al. STAR: ultrafast universal  
688 RNA-seq aligner. *Bioinformatics*. 2013;29(1):15-21. doi: 10.1093/bioinformatics/bts635. PubMed  
689 PMID: 23104886; PubMed Central PMCID: PMC3530905.
- 690 53. DeLuca DS, Levin JZ, Sivachenko A, Fennell T, Nazaire MD, Williams C, et al. RNA-SeQC: RNA-  
691 seq metrics for quality control and process optimization. *Bioinformatics*. 2012;28(11):1530-2. doi:  
692 10.1093/bioinformatics/bts196. PubMed PMID: 22539670; PubMed Central PMCID: PMC3356847.
- 693 54. Anders S, Pyl PT, Huber W. HTSeq--a Python framework to work with high-throughput  
694 sequencing data. *Bioinformatics*. 2015;31(2):166-9. doi: 10.1093/bioinformatics/btu638. PubMed  
695 PMID: 25260700; PubMed Central PMCID: PMC4287950.
- 696 55. Robinson MD, McCarthy DJ, Smyth GK. edgeR: a Bioconductor package for differential  
697 expression analysis of digital gene expression data. *Bioinformatics*. 2010;26(1):139-40. doi:  
698 10.1093/bioinformatics/btp616. PubMed PMID: 19910308; PubMed Central PMCID: PMC2796818.
- 699 56. Abbas AR, Baldwin D, Ma Y, Ouyang W, Gurney A, Martin F, et al. Immune response in silico  
700 (IRIS): immune-specific genes identified from a compendium of microarray expression data. *Genes*  
701 *Immun*. 2005;6(4):319-31. doi: 10.1038/sj.gene.6364173. PubMed PMID: 15789058.
- 702 57. Joice R, Narasimhan V, Montgomery J, Sidhu AB, Oh K, Meyer E, et al. Inferring  
703 developmental stage composition from gene expression in human malaria. *PLoS Comp Biol*.  
704 2013;9(12):e1003392. doi: 10.1371/journal.pcbi.1003392. PubMed PMID: 24348235; PubMed  
705 Central PMCID: PMC3861035.
- 706 58. Benjamini Y, Hochberg Y. Controlling False Discovery Rate: A Practical and Powerful  
707 Approach to Multiple Testing. *J R Stat Soc B*. 1995;57(1):289-300.
- 708 59. Supek F, Bosnjak M, Skunca N, Smuc T. REVIGO summarizes and visualizes long lists of gene  
709 ontology terms. *PLoS One*. 2011;6(7):e21800. doi: 10.1371/journal.pone.0021800. PubMed PMID:  
710 21789182; PubMed Central PMCID: PMC3138752.
- 711 60. Hu Y, Yan C, Hsu CH, Chen QR, Niu K, Komatsoulis GA, et al. OmicCircos: A Simple-to-Use R  
712 Package for the Circular Visualization of Multidimensional Omics Data. *Cancer Informatics*.

713 2014;13:13-20. doi: 10.4137/CIN.S13495. PubMed PMID: 24526832; PubMed Central PMCID:  
714 PMC3921174.

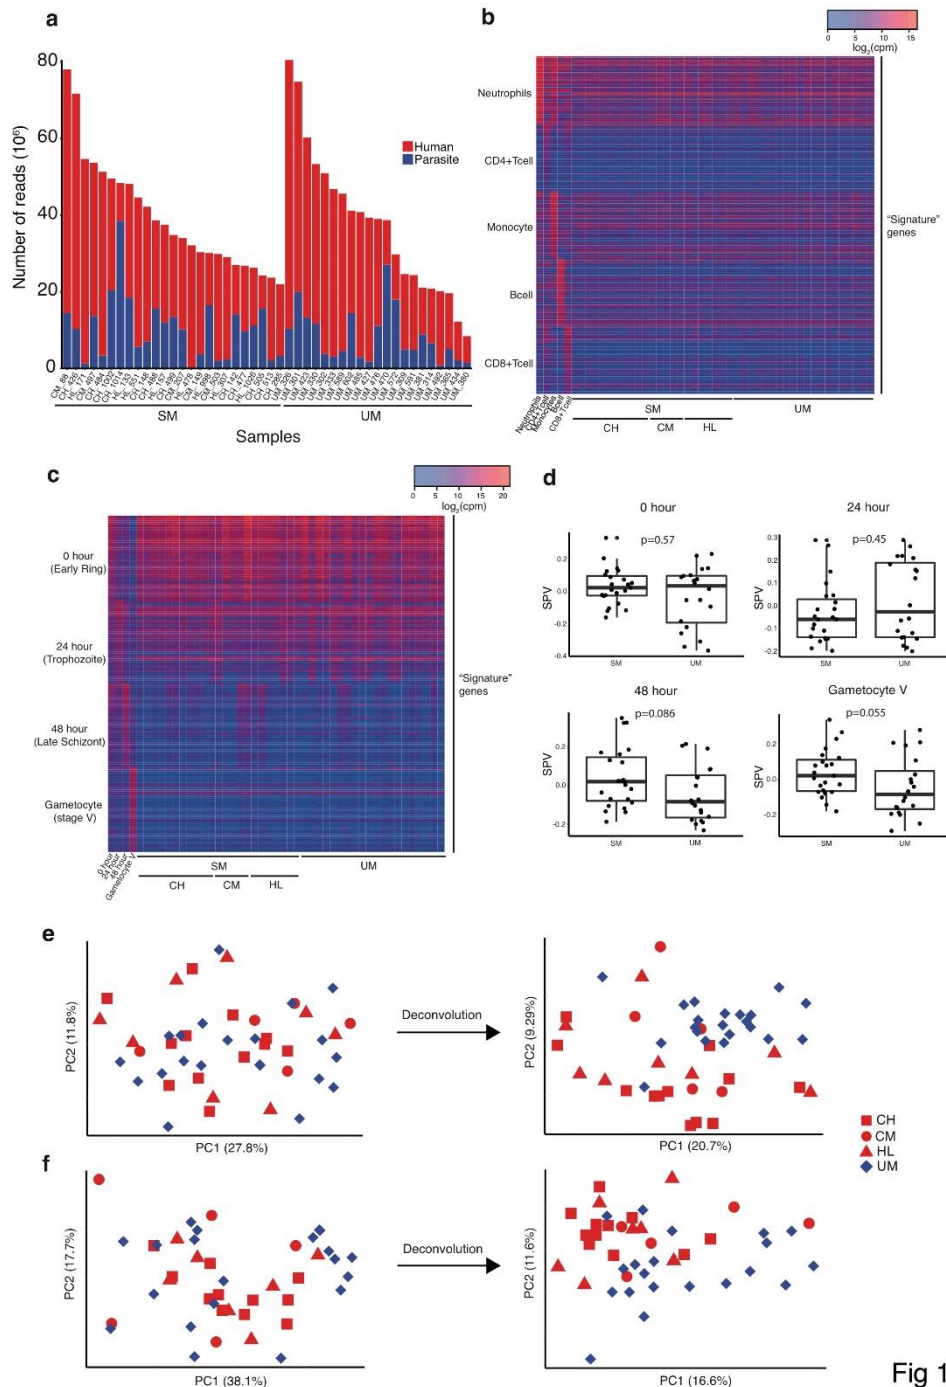

Fig 1

715 **Figure 1. Whole blood dual RNA-sequencing and deconvolution.** (a) Uniquely mapped reads from human (red) and *P. falciparum* (blue)

716 from subjects with severe (SM, n=25) and uncomplicated malaria (UM, n=21). (b,c) Heatmaps showing signature gene expression for

717 different leukocyte (b) and parasite developmental stage (c) populations (rows) and their relative intensity in individual subjects with SM,

718 including different SM phenotypes (CH, cerebral malaria plus hyperlactatemia; CM, cerebral malaria; HL, hyperlactatemia), and UM

719 (columns). (d) Surrogate proportion variables for parasite developmental stages compared between SM and UM using the Mann-Whitney

720 test (bold line, box and whiskers indicate median, interquartile range and 1.5-times interquartile range respectively). (e,f) Principal

721 component plots showing the effect of deconvolution on the segregation of subjects with UM and SM, adjusting human (e) and parasite (f)

722 gene expression for differences in proportions of leukocytes or parasite developmental stages respectively. Analyses of human gene

723 expression (b,e): SM, n=25; UM, n=21. Analyses of parasite gene expression (c,d, f): SM, n=23; UM, n=20.



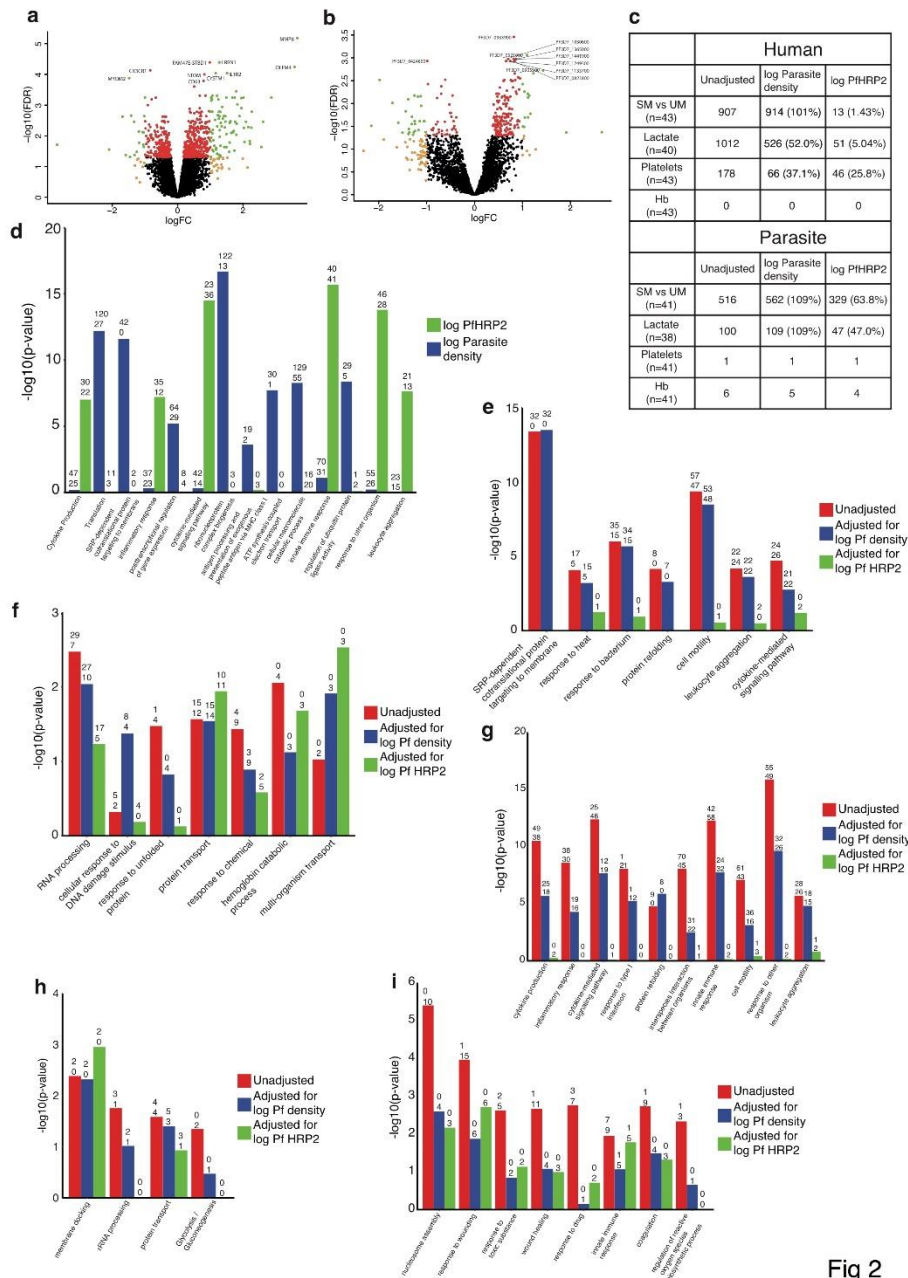

Fig 2

724 **Figure 2. Association of gene expression with severity features and dependency on parasite load. (a, b)** Volcano plots showing extent  
 725 and significance of up- or down- regulation of human (a) or *P. falciparum* (b) gene expression in SM compared with UM (red and green,  $P$   
 726  $<0.05$  after Benjamini-Hochberg adjustment for false discovery rate (FDR); orange and green, absolute  $\log_2$ -fold change (FC) in expression  $>$   
 727 1; the 10 most significant genes are annotated; human comparison SM n=25, UM=21; parasite comparison SM n=23, UM=20). (c) Number  
 728 of human and parasite genes associated with severity category and laboratory markers of severity before and after adjustment for  
 729 parasite load expressed as either log circulating parasite density or log PfHRP2 concentration. Only subjects with complete data for every  
 730 parameter are included. (d-i) Most significantly enriched, non-redundant, gene ontology terms for genes significantly associated with log  
 731 parasite density (d) and log PfHRP2 (e), and the effect of adjustment for these measures on genes significantly associated with severity (f-  
 732 i) (numbers above bars indicate the number of up-regulated/positively-associated and down-regulated/negatively-associated genes within  
 733 each category). (e,f) Human (e) and *P. falciparum* (f) genes significantly differentially expressed in SM vs UM. (g,h) Human (g) and *P.*  
 734 *falciparum* (h) genes significantly correlated with blood lactate concentration. (i) Human genes significantly correlated with platelet count.



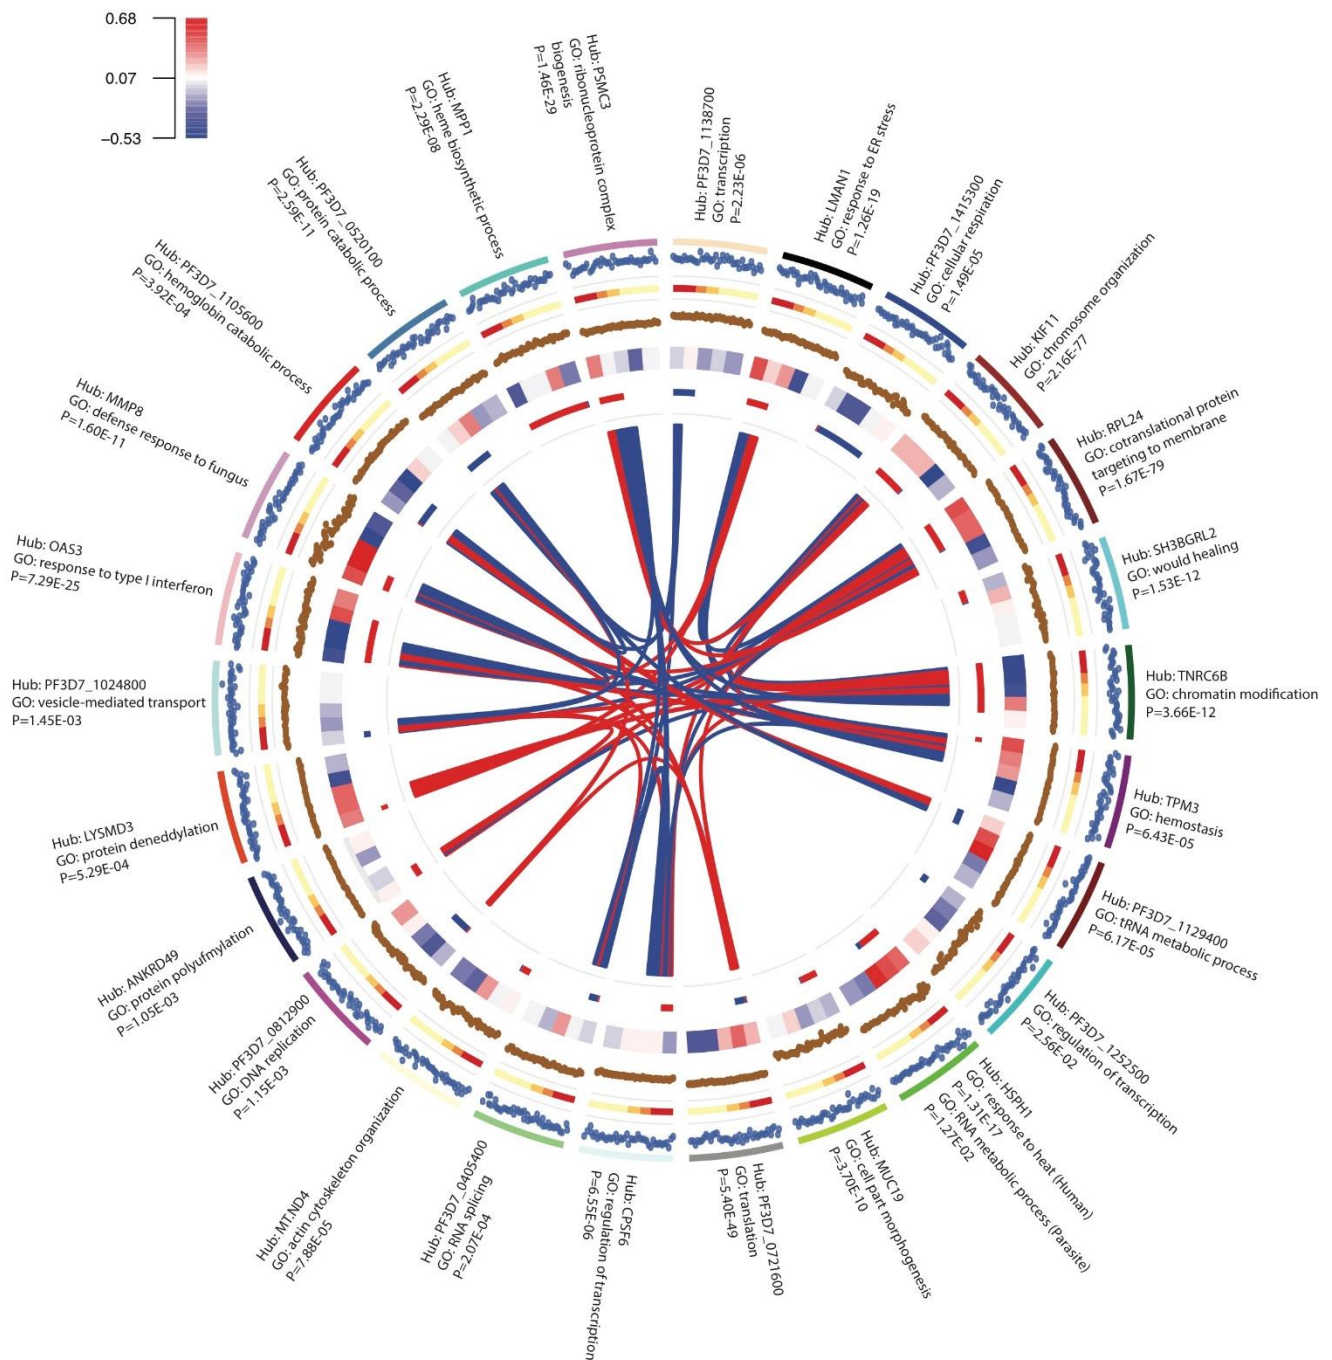

735

736 **Figure 3. Interspecies gene expression modules and their associations with severity.** Circos plot showing gene expression modules

737 obtained from whole genome correlation network analysis using expression of all human and parasite genes from each subject (SM, n=22;

738 UM, n=19) as the input. From outside to inside: labels, hub gene and most enriched GO term (with enrichment P-value) for each module;

739 track 1, module eigengene value for each subject; track 2, clinical phenotype (Red=CH, Orange=CM, Green=HL, Yellow=UM); track 3, hub

740 gene expression (log CPM) for each subject; track 4, heatmap for correlation with laboratory measurements (clockwise: log parasite

741 density, log PfHRP2, lactate, platelets, haemoglobin; colour intensity represents Pearson correlation coefficient as shown in legend); track

742 5, module size and composition (length proportional to number of genes in module; red, human genes; blue, parasite genes); polygons

743 connect modules with significant (FDR P<0.01) Pearson correlation between eigengene values (width proportional to  $-\log_{10}$  FDR P-value;

744 red=positive correlation, blue=negative correlation)

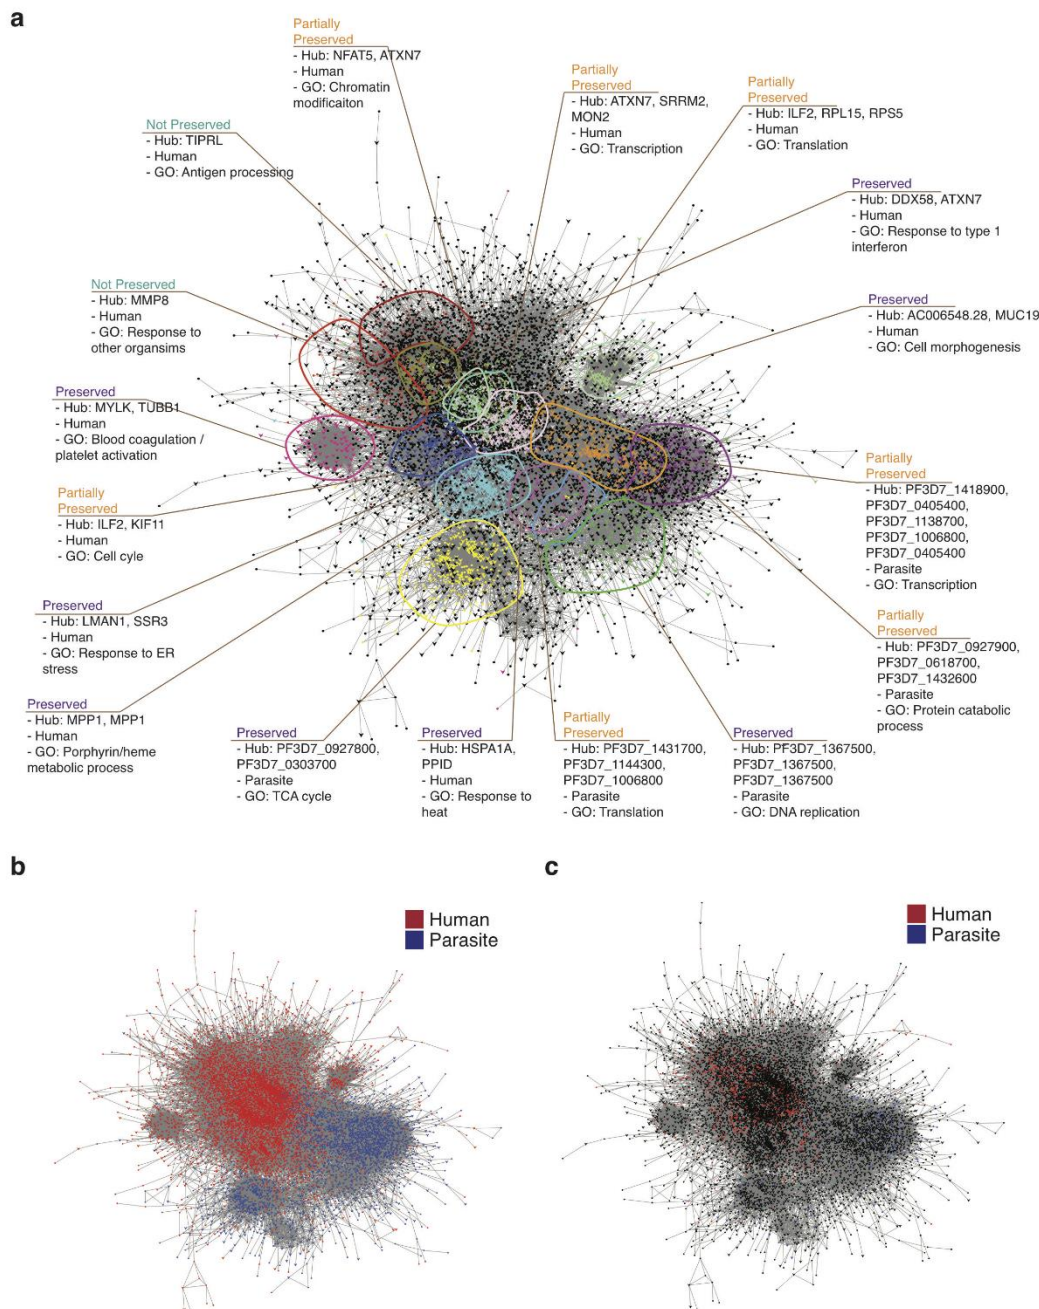

745 **Figure 4. Severity-associated differential co-expression within the interspecies gene expression network. (a-c)** Cytoscape visualisation of  
 746 merged co-expression networks derived separately from SM (n=22) and UM (n=19). Networks were merged such that genes found in both  
 747 sub-networks (represented as arrow-shaped, larger-sized nodes) are connected to genes found in only one sub-network (represented as  
 748 circular-shaped and smaller-sized nodes). **(a)** Genes and gene clusters are coloured and annotated by module, species, most enriched gene  
 749 ontology terms, and conservation between sub-networks (preserved, module pairs from SM and UM sub-networks display highly  
 750 significant overlap with each other and much less significant overlap with other modules; partially preserved, module clusters display  
 751 significant overlaps with two or more modules in the other subnetwork; unique, gene clustering only found in one sub-network); genes in  
 752 black do not belong to any characterized module. **(b)** Identical network layout with genes coloured by species (red, human; blue, *P.*  
 753 *falciparum*). **(c)** Identical network layout with genes coloured by whether they are significantly differentially expressed in SM vs UM (red,  
 754 human; blue, *P. falciparum*; black, not differentially expressed).

755 **Supplementary Material**

756 **Supplementary Table 1. Characteristics of study subjects (n=46)**

|                                       | <b>CM (n=5)</b>                  | <b>CH (n=12)</b>                  | <b>HL (n=8)</b>                  | <b>UM (n=21)</b>                  | <b>P (F value)</b> |
|---------------------------------------|----------------------------------|-----------------------------------|----------------------------------|-----------------------------------|--------------------|
| <b>Age (years)</b>                    | 4.3 (4.2-4.8)                    | 4.9 (3.6-5.7)                     | 5.0 (3.8-8.3)                    | 6.0 (4.0-9.0)                     | 0.24<br>(1.47)     |
| <b>Male (%)</b>                       | 3 (60%)                          | 5 (42%)                           | 7 (88%)                          | 13 (62%)                          | 0.24               |
| <b>Parasitemia (%)</b>                | 8.3 (5.3-9.0) <sup>4</sup>       | 12.6 (9.4-19.0)                   | 9.6 (1.8-12.2)                   | 5.1 (3.8-7.0)                     | 0.02<br>(3.67)     |
| <b>Parasites (x10<sup>5</sup>/uL)</b> | 2.3 (1.7-3.1) <sup>3</sup>       | 3.5 (2.7-8.4) <sup>11</sup>       | 2.8 (0.7-5.0)                    | 2.3 (1.6-3.2)                     | 0.02<br>(3.55)     |
| <b>Clones</b>                         | 2 (1.5-2.5) <sup>4</sup>         | 2 (1-2) <sup>9</sup>              | 1 (1-2) <sup>5</sup>             | 2 (1-2) <sup>15</sup>             | 0.68<br>(0.51)     |
| <b>PfHRP2 (ng/mL)</b>                 | 202 (93-528) <sup>4</sup>        | 763 (374-1750)                    | 470 (164-2214)                   | 163 (128-227)                     | 0.001<br>(6.20)    |
| <b>Duration of illness (days)</b>     | 2.0 (1.7-3.0)                    | 2.0 (2.0-2.5)                     | 2.0 (2.0-3.5)                    | 2.7 (2.0-3.0)                     | 0.57<br>(0.68)     |
| <b>Hb (g/dL)</b>                      | 9.7 (7.4-10.4)                   | 9.3 (7.8-11.5) <sup>11</sup>      | 9.1 (7.4-11.0)                   | 10.8 (9.9-12.1)                   | 0.10<br>(2.24)     |
| <b>WBC (x10<sup>9</sup>/L)</b>        | 9.8 (8.2-12.9) <sup>4</sup>      | 8.8 (6.4-9.4) <sup>11</sup>       | 15.3 (7.9-16.8) <sup>7</sup>     | 9.5 (7.7-11.8)                    | 0.30<br>(1.27)     |
| <b>Platelets (x10<sup>9</sup>/L)</b>  | 41 (40-82) <sup>4</sup>          | 36 (23-65) <sup>11</sup>          | 59 (33-132)                      | 122 (96-132)                      | 0.04<br>(3.15)     |
| <b>Lymphocyte (%)</b>                 | 29.8<br>(20.6-37.3) <sup>4</sup> | 37.8<br>(29.9-49.9) <sup>11</sup> | 22.3<br>(14.7-37.3)              | 23.9<br>(16.0-33.5) <sup>20</sup> | 0.05<br>(2.78)     |
| <b>Neutrophil (%)</b>                 | 55.1<br>(49.0-69.6) <sup>4</sup> | 48.3<br>(39.6-56.2) <sup>10</sup> | 61.5<br>(55.6-74.9) <sup>7</sup> | 68.0<br>(59.9-79.6) <sup>20</sup> | 0.01<br>(4.25)     |
| <b>Monocyte (%)</b>                   | 7.1<br>(6.0-7.7) <sup>4</sup>    | 7.8<br>(6.8-8.6) <sup>10</sup>    | 6.6<br>(5.1-7.8) <sup>7</sup>    | 6.7<br>(4.8-7.3) <sup>20</sup>    | 0.38<br>(1.05)     |

757 CM, cerebral malaria; CH, cerebral malaria plus hyperlactatemia; HL, hyperlactatemia (CM, CH, and HL are all subgroups of severe malaria,  
 758 SM); UM, uncomplicated malaria. Data are median (IQR), superscripts indicate the number of subjects with data for each variable if less  
 759 than the total; P (F) for ANOVA comparing all groups (degrees of freedom =3) except for sex where P is for Fisher's exact test.

760 **Supplementary Table 2. Human genes differentially expressed between severe malaria**  
761 **phenotypes and uncomplicated malaria in unadjusted and parasite load-adjusted analyses.**

762

763 **Supplementary Table 3. *P. falciparum* genes differentially expressed between severe malaria**  
764 **phenotypes and uncomplicated malaria.**

765

766 **Supplementary Table 4. Human genes significantly correlated with parasite load measurements**  
767 **and laboratory parameters.**

768

769 **Supplementary Table 5. *P.falciparum* genes significantly correlated with parasite load and**  
770 **laboratory parameters.**

771

772 **Supplementary Table 6. Gene ontology terms associated with human differentially expressed or**  
773 **significantly correlated genes in unadjusted and parasite load-adjusted analyses.**

774

775 **Supplementary Table 7. Predicted upstream regulators associated with human differentially**  
776 **expressed or significantly correlated genes in unadjusted and parasite load-adjusted analyses.**

777

778 **Supplementary Table 8. Gene ontology terms associated with parasite differentially expressed or**  
779 **significantly correlated genes in unadjusted and parasite load-adjusted analyses.**

780

781 **Supplementary Table 9. Summary of modules obtained from combined whole genome correlation**  
782 **network.**

783

784

785 **Supplementary Table 10. Univariate and multivariate associations of module eigengene values and**  
 786 **parasite load with severity.**

787

|                      | Univariate<br>log odds | Univariate<br>P-value | Multivariate<br>log odds | Multivariate<br>P-value |
|----------------------|------------------------|-----------------------|--------------------------|-------------------------|
| <b>MMP8</b>          | 12.4                   | 0.00130               | <b>66.1</b>              | <b>0.0152</b>           |
| <b>LYSMD3</b>        | 9.49                   | 0.00353               | <b>28.6</b>              | <b>0.0178</b>           |
| PF3D7_1129400        | 10.0                   | 0.00388               |                          |                         |
| RPL24                | 7.77                   | 0.00463               |                          |                         |
| <b>OAS3</b>          | -6.73                  | 0.00943               | <b>47.7</b>              | <b>0.0261</b>           |
| HSPH1                | 9.74                   | 0.0117                |                          |                         |
| TNRC6B               | -6.44                  | 0.0136                |                          |                         |
| KIF11                | 6.15                   | 0.0179                |                          |                         |
| PF3D7_1415300        | -8.77                  | 0.0184                |                          |                         |
| PF3D7_1252500        | -5.50                  | 0.0216                |                          |                         |
| PF3D7_1105600        | -5.91                  | 0.0218                |                          |                         |
| LMAN1                | 5.63                   | 0.0255                |                          |                         |
| PF3D7_0721600        | 5.33                   | 0.0283                |                          |                         |
| PF3D7_0520100        | 4.99                   | 0.0307                |                          |                         |
| TPM3                 | 4.44                   | 0.0560                |                          |                         |
| ANKRD49              | 3.43                   | 0.133                 |                          |                         |
| MT.ND4               | 2.48                   | 0.251                 |                          |                         |
| PF3D7_0405400        | 2.18                   | 0.289                 |                          |                         |
| MUC19                | -2.18                  | 0.315                 |                          |                         |
| PF3D7_0812900        | -1.85                  | 0.367                 |                          |                         |
| SH3BGRL2             | -1.41                  | 0.491                 |                          |                         |
| PSMC3                | 1.17                   | 0.568                 |                          |                         |
| PF3D7_1024800        | -1.08                  | 0.596                 |                          |                         |
| PF3D7_1138700        | 0.938                  | 0.643                 |                          |                         |
| CPSF6                | 0.647402239            | 0.747                 |                          |                         |
| MPP1                 | 0.02183521             | 0.991                 |                          |                         |
| Log parasite density | 1.17                   | 0.0339                |                          |                         |
| Log PfHRP2           | 1.4031                 | 0.00440               |                          |                         |

788 Log odds are per unit change in the variable, calculated using logistic regression. The multivariate  
 789 model was derived by backwards selection from all variables with univariate P<0.01.

790 **Supplementary Table 11. Summary and overlap of whole genome correlation sub-networks for**

791 **severe and uncomplicated malaria.**

792



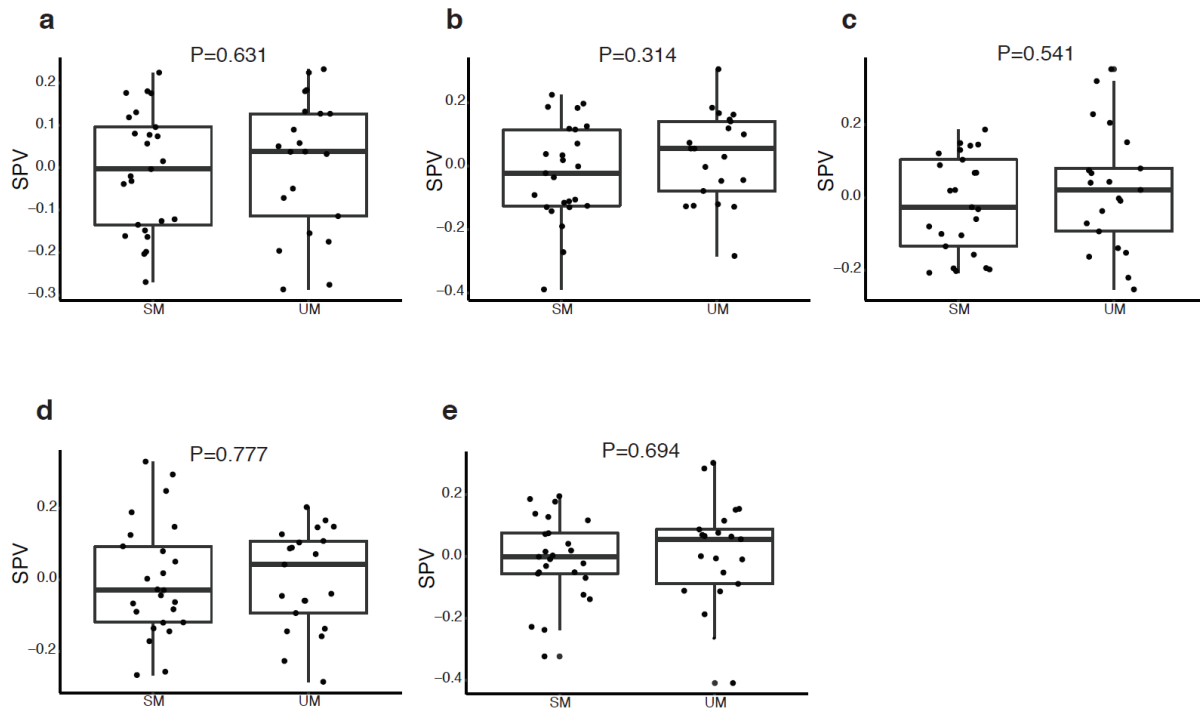

793

794 **Supplementary Fig 1. Estimates of the relative proportions of leukocyte subpopulations in subjects with severe and uncomplicated**

795 **malaria. (a-e)** Surrogate proportion variables compared by severity category for neutrophils (a), monocytes (b), CD4+ T-lymphocytes (c),

796 CD8+ T-lymphocytes (d), and B-lymphocytes (e) using the Mann-Whitney test (UM, n=21; SM, n=25; bold line, box and whiskers indicate

797 median, interquartile range and 1.5-times interquartile range respectively).

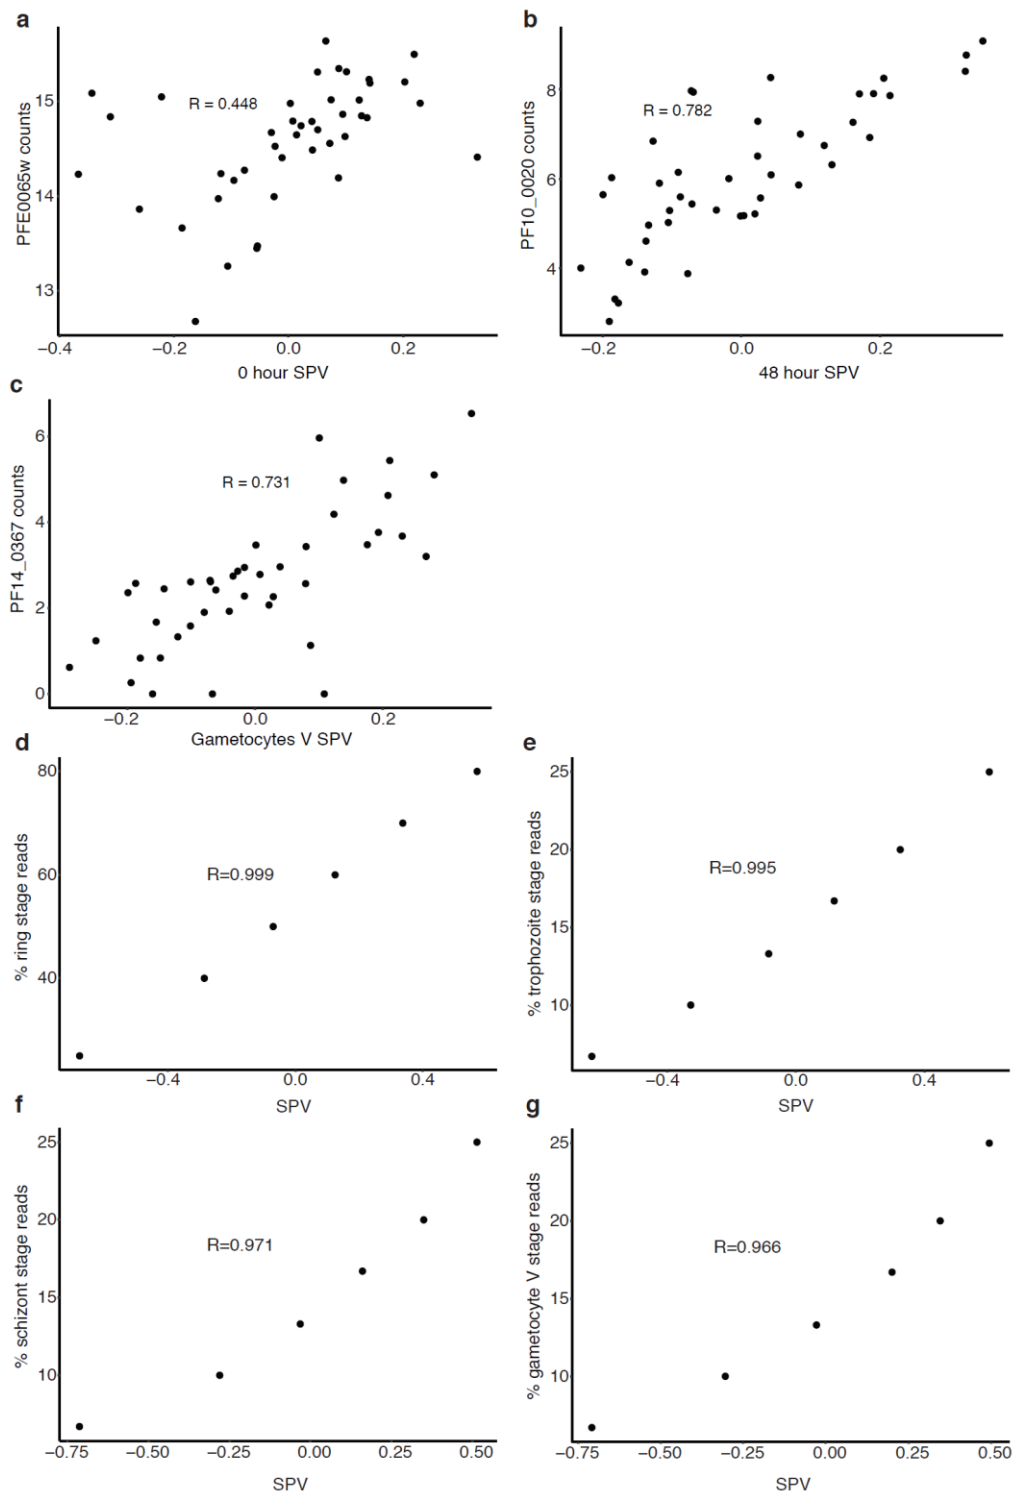

798

799 **Supplementary Fig 2. Validation of the gene-signature approach to estimate parasite developmental stage proportions. (a-c)** Correlation

800 of surrogate proportion variables (SPV) with read counts for putative "stage-specific" marker genes (see Methods): **(a)** 0hr SPV vs. early

801 asexual stage marker gene PFE0065w; **(b)** 48hr SPV vs. late asexual stage marker gene PF10\_0020; **(c)** Gametocyte V SPV vs. developing

802 gametocyte marker gene PF14\_0367 (R for Pearson correlation, n=43). **(d-g)** Correlation of SPVs with actual proportion of reads derived

803 from each parasite developmental stage in synthetic mixtures of varying proportions of stage-specific RNA-seq reads from early ring-stage

804 (0 hour, **d**), trophozoite (24 hour, **e**), late schizont (48 hour, **f**) and mature gametocyte (Stage V, **g**). R for Pearson correlation, n=43.



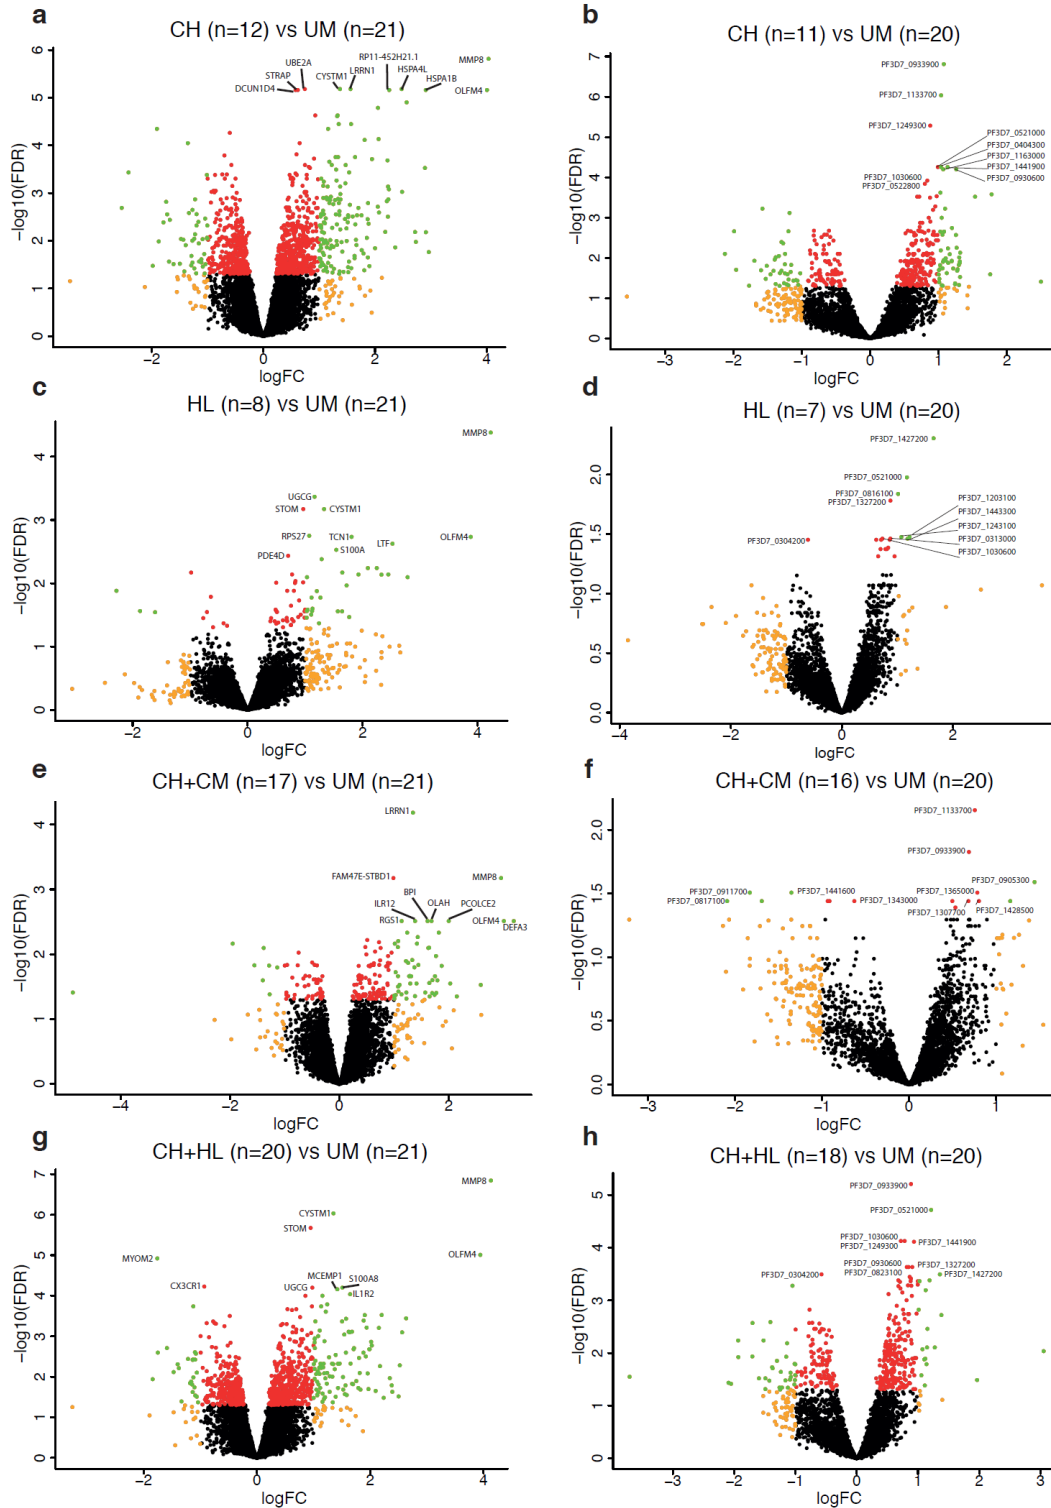

805

806 **Supplementary Fig 3. Differential gene expression between severe malaria phenotypes and uncomplicated malaria.** Volcano plots

807 showing extent and significance of up- or down- regulation of human (left hand column) or *P. falciparum* (right hand column) gene

808 expression in comparisons between specific phenotypes of SM vs UM (red and green,  $P < 0.05$  after Benjamini-Hochberg adjustment for

809 false discovery rate (FDR); orange and green, absolute  $\log_2$ -fold change (FC) in expression  $> 1$ ; the 10 most significant genes are

810 annotated).

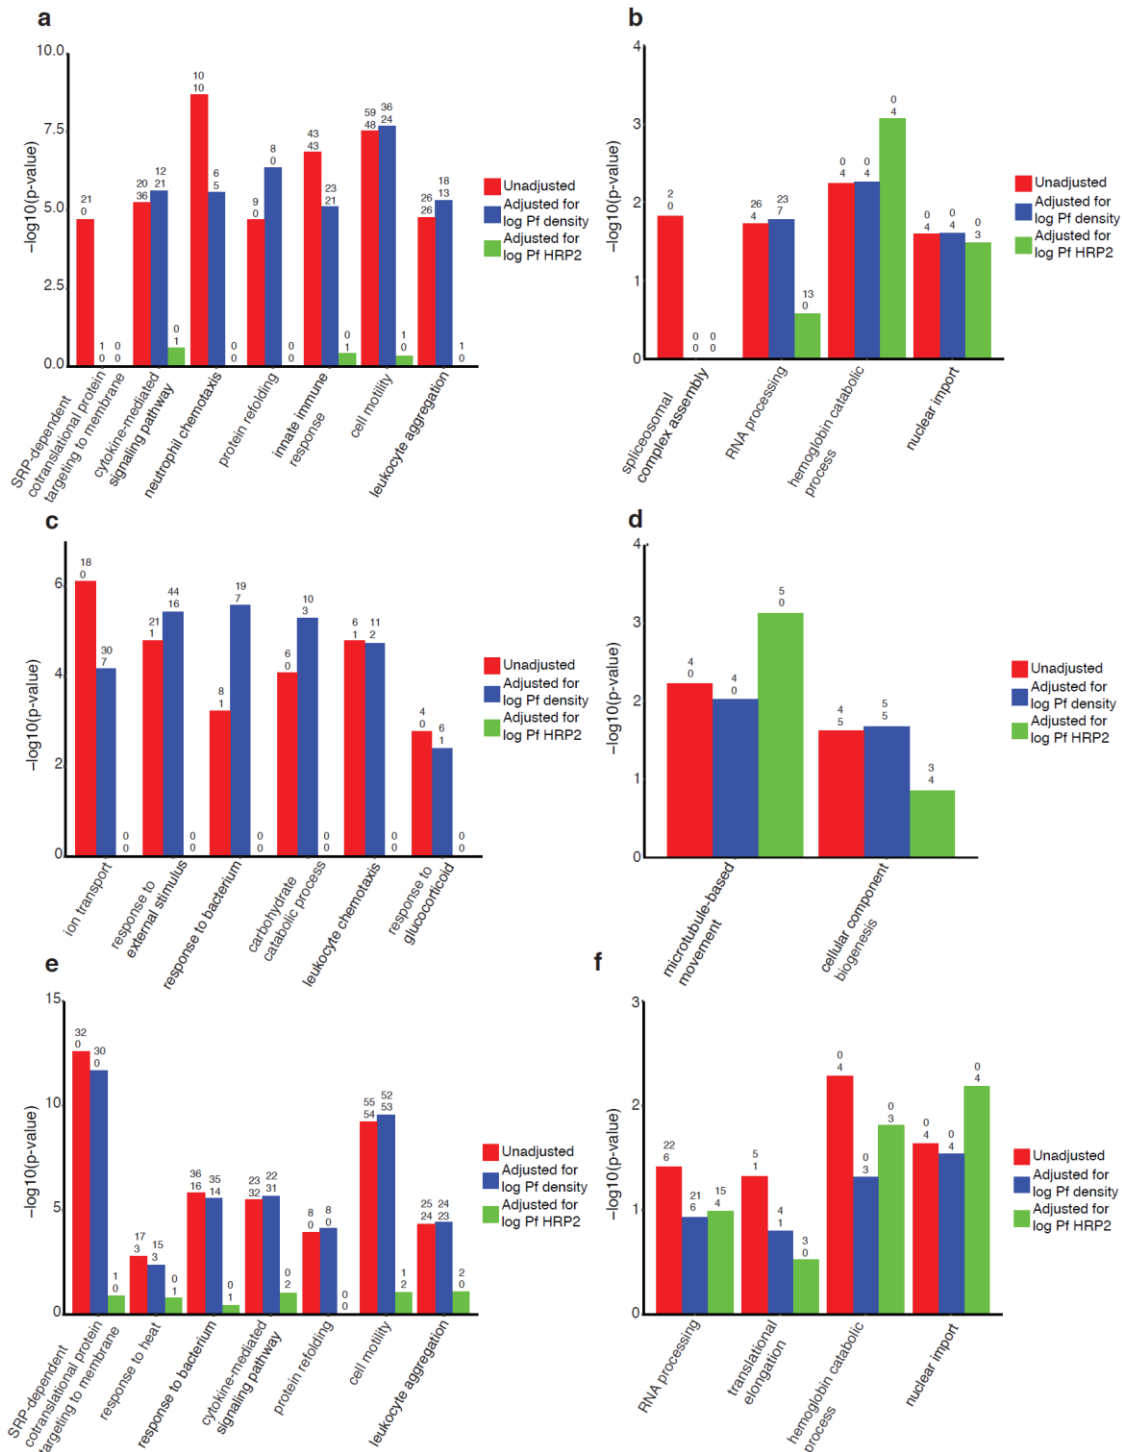

811

812 **Supplementary Fig 4. Gene ontology terms associated with genes differentially expressed between severe malaria phenotypes and**

813 **uncomplicated malaria, unadjusted or adjusted for parasite load.** Most significantly enriched, non-redundant, gene ontology terms for

814 genes significantly differentially expressed (DEGs) between SM phenotypes and UM (numbers above each bar indicate the number of up-

815 regulated and down-regulated genes within each category). Comparisons are only shown if they include multiple significantly enriched GO

816 terms. (a) CH (n=11) vs UM (n=21) human DEGs, (b) CH (n=11) vs UM (n=20) *P. falciparum* DEGs, (c) HL (n=8) vs UM (n=21) human DEGs,

817 (d) CH+CM (n=14) vs UM (n=20) *P. falciparum* DEGs, (e) CH+HL (n=19) vs UM (n=21) human DEGs, (f) CH+HL (n=18) vs UM (n=20) *P.*

818 *falciparum* DEGs.

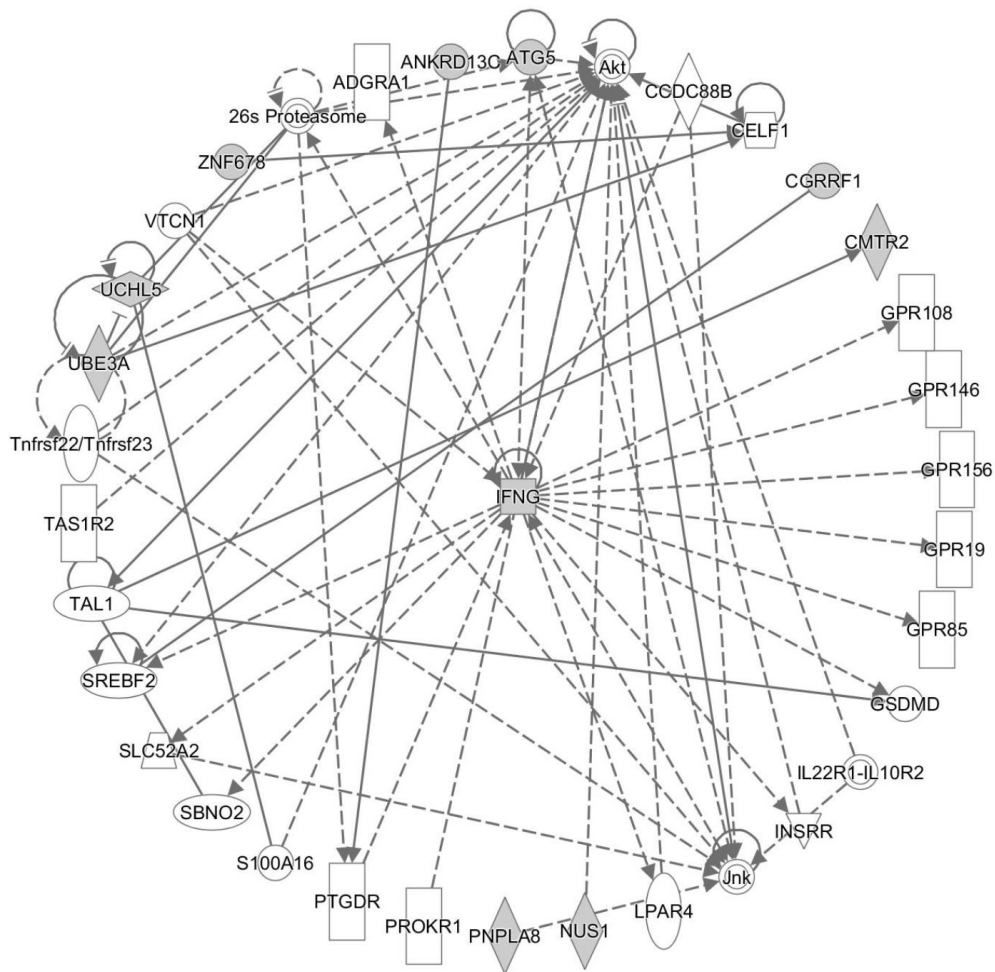

819

820 **Supplementary Fig 5. Top functional network for the small LYSDM3 module.** Functional networks were identified in Ingenuity Pathway

821 Analysis software and the top scoring network is portrayed in radial layout which places the most interconnected gene at the centre.

822 Genes within the module are shaded.

823

824 **Supplementary Dataset 1. Subject-level clinical and laboratory data**
